# Supplementary material for: Biogenic and Anthropogenic sources of Arctic Aerosols
Source: Copernicus journal article supplement (doi:10.5194/acp-2019-130), 2019-03-25
Supplement: Supplementary file [file acp-2019-130-RC3-supplement.pdf]

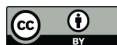

## Biogenic and Anthropogenic sources of Arctic Aerosols

Ingeborg E. Nielsen<sup>1,2</sup>, Henrik Skov<sup>1,2,5</sup>, Andreas Massling<sup>1,2</sup>, Axel C. Eriksson<sup>3,4</sup>,  
Manuel Dall'Osto<sup>6</sup>, Heikki Junninen<sup>7,10</sup>, Nina Sarnela<sup>7</sup>, Robert Lange<sup>1,2</sup>, Sonya  
Collier<sup>8</sup>, Qi Zhang<sup>8</sup>, Christopher D. Cappa<sup>9</sup> and Jacob K. Nøjgaard<sup>1,2\*</sup>

- 5 <sup>1</sup>Department of Environmental Science, Aarhus University, Roskilde, 4000, Roskilde, Denmark  
<sup>2</sup>Arctic Research Centre, Aarhus University, Aarhus, 8000, Aarhus, Denmark  
<sup>3</sup>Division of Ergonomics and Aerosol Technology, Lund University, Box 118, SE-22100, Lund, Sweden  
<sup>4</sup>Division of Nuclear Physics, Lund University, Lund, Box 118, SE-22100, Lund, Sweden  
<sup>5</sup>Institute of Chemical Engineering and Biotechnology and Environmental Technology, University of  
10 Southern Denmark, 5230, Odense, Denmark  
<sup>6</sup>Institute of Marine Sciences, CSIC, Passeig Marítim de la Barceloneta, 37-49. E-08003, Barcelona,  
Spain  
<sup>7</sup>Institute for Atmospheric and Earth System Research / Physics, Faculty of Science, University of  
Helsinki, 00140 Helsinki, Finland  
15 <sup>8</sup>Department of Environmental Toxicology, University of California, Davis, CA 95616, USA  
<sup>9</sup>Department of Civil and Environmental Engineering, University of California, Davis, CA 95616, USA  
<sup>10</sup>Institute of Physics, University of Tartu, Ülikooli 18, EE-50090 Tartu, Estonia

Correspondence to: Ingeborg Elbæk Nielsen ([ien@envs.au.dk](mailto:ien@envs.au.dk))

**Abstract.** There are limited measurements of the chemical composition, abundance, and sources of black  
20 carbon (BC) containing particles in the high Arctic. To address this, we report 93 days of Soot Particle  
Aerosol Mass Spectrometer (SP-AMS) data collected in the high Arctic. The period ~~spanned~~ <sup>spanned</sup> from February  
20<sup>th</sup> until May 23<sup>rd</sup> 2015 at Villum Research Station (VRS) in Northern Greenland (81°36' N). Particulate  
sulfate (SO<sub>4</sub><sup>2-</sup>) accounted for 66% of the non-refractory PM<sub>1</sub>, ~~which amounted to 2.3 μg m<sup>-3</sup> as an average~~  
25 value observed during the campaign. The second most abundant species was organic matter (24%),  
averaging 0.55 μg m<sup>-3</sup>. Both organic aerosol (OA) and PM<sub>1</sub>, estimated from the sum of all collected  
species, showed a marked decrease throughout May in accordance with Arctic haze ~~leveling-off~~. The  
refractory black carbon (rBC) concentration averaged 0.1 μg m<sup>-3</sup> over the entire campaign.

Positive Matrix Factorization (PMF) of the OA mass spectra yielded three factors: (1) a hydrocarbon-  
30 like Organic Aerosol (HOA) factor, which was dominated by primary aerosols and accounted for 12%  
of OA mass; (2) an Arctic haze Organic Aerosol (AOA) factor, which accounted for 64% of the OA and  
dominated until mid-April while being nearly absent from the end of May; and (3) a more oxygenated  
Marine Organic Aerosol (MOA) factor, which accounted for 22% of OA. AOA correlated significantly  
with SO<sub>4</sub><sup>2-</sup>, suggesting the main part of that factor being secondary OA. The MOA emerged ~~late~~  
35 at the end of March, where it increased with solar radiation and reduced sea ice extent, and dominated OA for  
the rest of the campaign until the end of May. ~~Important differences are observed among the factors,~~  
~~including~~ the highest O/C ratio (0.95) and S/C ratio (0.011) for MOA ~~—the marine-related factor~~. Our  
data supports current understanding of the ~~Arctic~~ summer aerosols, driven mainly by secondary aerosol  
formation, but with an important contribution from marine emissions. In view of a changing Arctic  
climate with changing sea-ice extent, biogenic processes, and corresponding source strengths, highly

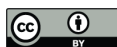

40 time-resolved data are urgently needed in order to elucidate the components dominating aerosol concentrations.

## 1 Introduction

Climate change driven by anthropogenic emission of greenhouse gases seriously impacts the Arctic. Areas such as the Arctic have experienced average temperature increases of twice the global mean during the last 100 years (IPCC, 2013). Warming has led to destabilization of permafrost (AMAP, 2017) and a longer melting season resulting in a critical decrease in the sea-ice extent (Stroeve et al., 2007). The latter changes the Earth's albedo and results in positive sea-ice and snow-albedo feedbacks causing further warming (Lenton, 2012). In addition to long-lived greenhouse gases such as CO<sub>2</sub>, atmospheric aerosols also have an impact on the radiation balance of the Earth. Aerosols affect the radiative balance in various ways. They can absorb and scatter solar radiation, causing either warming or cooling of the atmosphere, respectively. Aerosols can also impact the properties of clouds, for example affecting cloud reflectivity, by serving as cloud ice-condensation nuclei (Twomey, 1977).

It is well established that the aerosol concentration in the Arctic atmosphere is seasonally varying resulting in higher loadings during winter and spring, compared to summer and fall, often referred to as "the Arctic haze" (Heidam et al., 2004; Tunved et al., 2013; Heidam et al., 1999; Quinn et al., 2007; Barrie et al., 1981; Heidam, 1984). This is explained by a greater accessibility to the lower troposphere in the Arctic from anthropogenic source regions outside the Arctic due to an expansion of the polar dome (AMAP, 2011) in winter and spring. In addition, during the Arctic winter strong temperature inversions create stable stratification where aerosol removal processes are strongly reduced prolonging their atmospheric lifetime (Stohl, 2006; Sodemann et al., 2011; AMAP, 2011). The air masses inside the wintertime dome are extremely dry, limiting aerosol wet deposition, while low turbulence exchange caused by the stratification and slow vertical exchange reduces the dry deposition of aerosols (Sodemann et al., 2011; Stohl, 2006; Abbatt et al., 2018). The Arctic haze is observed during spring and is visible as a distinct pollution layer (Heidam et al., 1999; Law and Stohl, 2007; Stohl, 2006; Heidam et al., 2004). Arctic haze particles effectively scatter light (Andrews et al., 2011; Schmeisser et al., 2018), and act as cloud condensation nuclei (CCN) (Earle et al., 2011; Komppula et al., 2005). A major part of the aerosol mass is long-range transport from source regions outside the Arctic where the primary source region has been identified as the northern part of Eurasia (Nguyen et al., 2013; Quinn et al., 2008; Heidam et al., 2004; Stohl et al., 2007; Abbatt et al., 2018; Christensen, 1997). Studies have shown that main constituents of Arctic aerosols are sulfate (SO<sub>4</sub><sup>2-</sup>) and organics mixed with a minor fraction of nitrate (NO<sub>3</sub><sup>-</sup>), ammonium (NH<sub>4</sub><sup>+</sup>), black carbon (BC) and heavy metals (Quinn et al., 2007; Fenger et al., 2013; Nguyen et al., 2013; Frossard et al., 2011; Barrie et al., 1981). This is also the case at the high Arctic station, Villum Research Station (VRS) at Station Nord in North Greenland, where this study was conducted. Rahn and Heidam (1981) have previously estimated the average chemical composition of Arctic submicrometer aerosols during winter-spring, which amounted to 2 μg m<sup>-3</sup> SO<sub>4</sub><sup>2-</sup>, 1 μg m<sup>-3</sup> organic aerosol (OA), 0.3-0.5 μg m<sup>-3</sup> BC and a few hundred ng m<sup>-3</sup> of other compounds. Since then, SO<sub>4</sub><sup>2-</sup> and BC during winter-spring have declined at Alert, Mount Zeppelin and VRS (Heidam et al., 1999; Hirdman



et al., 2010). However, the total Arctic column burden may have increased (Sharma et al., 2013). No significant changes have been observed for  $\text{SO}_4^{2-}$  and BC at Barrow (Hirdman et al., 2010).

80 BC is the most important aerosol at absorbing solar radiation in the atmosphere. Of particular concern for the Arctic, when BC is deposited on snow and ice-covered surfaces it changes the albedo, leading to increased absorption of solar radiation and direct heating of the surface (Bond et al., 2013). Consequently, melting accelerates giving BC an important role especially in an Arctic context (Bond et al., 2013; Quinn et al., 2008; AMAP, 2011). Long-range transport of BC to the Arctic is very effective in mid-winter, 85 when removal processes are slowest. Transport reaches a minimum in March – April and wet deposition becomes the most important removal process in the later spring (Abbatt et al., 2018). Still, natural emissions from vegetation fires can be considerable in spring and early summer (Mahmood et al., 2016). Overall, this leads to a general seasonal cycle with the highest concentrations of BC observed between January and April and the lowest concentrations throughout the summer, but with periodic spikes in 90 concentration throughout the summer (Sharma et al., 2006). OA is also an important component of Arctic aerosol and is composed of many different molecules derived from either primary emissions or from secondary production. Consequently, there are often many distinct sources of OA. OA can typically contribute to one third of  $\text{PM}_{10}$  in the Arctic though few studies have characterized this component in detail (Bardet et al., 2015; Brock et al., 2011; Frossard et al., 2011; Kawamura et al., 2010; Quinn et al., 95 2002; Shaw et al., 2010). Total OC is relatively constant or decreasing with time in late winter. However, during spring it increases suggesting that there is photochemical production of OA (Willis et al., 2018). There is a need for more detailed measurements of OA composition in the Arctic to better understand the key sources and how these vary with time (Willis et al., 2018). Due to aerosols' climatic importance it is crucial to expand the knowledge regarding their chemical and physical properties in the Arctic to 100 reduce the current uncertainty (IPCC, 2013) with respect to the overall effect of aerosols on Earth's energy budget.

It is crucial to understand natural sources in addition to anthropogenic sources of Arctic aerosols. Marine and coastal marine locations constitute a large part of Arctic, and marine aerosols is a source of inorganic and organic aerosols. Production of primary marine aerosols is known to correlate with wind speed and 105 possibly also other mechanisms (Willis et al., 2018). Primary marine organic aerosols in Arctic regions are believed to consist of water soluble or surface active organic compounds present in the surface water, or water insoluble microgels (Willis et al., 2018; Leck and Bigg, 2005; Orellana et al., 2011). Sea salt aerosols play an important role for the climate in spring and autumn (Abbatt et al., 2018). Methane sulfonic acid (MSA), an oxidation product of dimethyl sulfide (DMS) is abundant in spring and summer 110 (Abbatt et al., 2018) and is a key indicator of secondary marine aerosols. Increases in MSA levels has been associated with marginal sea ice moving North (Laing et al., 2013; Quinn et al., 2009; Sharma et al., 2012). In fact, DMS emissions in the Arctic have increased by 30% per decade the last two decades due to both increased temperatures and decreased ice cover (Abbatt et al., 2018). A relationship between MSA and the frequency of new particle formation has also been recently demonstrated based on long- 115 term observations (Dall'Osto et al., 2017). This suggest that DMS is important for summertime particle formation. Another important natural source of Arctic aerosols is ammonia, which is believed to originate



from migrating sea bird colonies (Croft et al., 2016). Modeling studies have been shown to better capture particle burst and growth when an ammonia source from sea birds were included (Croft et al., 2018; Croft et al., 2016). Additionally, ammonia can also be transported from boreal wildfires from lower latitudes.

120 Many previous Arctic studies have been based on off-line analysis and filter measurements of ambient aerosols with a relatively low time resolution of hours up to a week (Heidam et al., 1999; Heidam et al., 2004; Skov et al., 2006; Quinn et al., 2007; Massling et al., 2015; Leitch et al., 2018; Sharma et al., 2012; Quinn et al., 2009). **Beside the low time resolution, two disadvantages of these types of**

125 **measurements can be evaporate loss or adsorption of semi-volatile compounds** (Lee et al., 2013; Dillner et al., 2009). Highly time-resolved in-situ measurements can reduce these artifacts while ~~also enabling~~ ~~the possibility to observe~~ the variations ~~and trends~~ of different chemical species on a much shorter time-scale. In this way, it is possible to ~~look into the processes behind the observed levels~~. In the last decade, ~~Aerosol Mass Spectrometry (AMS)~~ (Canagaratna et al., 2007; DeCarlo et al., 2006; Jimenez et al., 2003; Drewnick et al., 2005; Jay  al., 2000) has been widely used as an on-line method for quantitative

130 analysis of chemical composition of atmospheric particles. With the addition of a laser vaporizer (Onasch et al., 2012), its application has been extended to include refractory aerosol components, including refractory black carbon (rBC).

In this study, the time dependent concentrations of sub-micrometer particle composition including OA,  $\text{SO}_4^{2-}$ ,  $\text{NO}_3^-$ ,  $\text{NH}_4^+$ , chloride (Cl) and rBC are reported ~~at~~ the high Arctic site VRS in Northern Greenland.

135 The measurements were conducted ~~by application of~~ a soot particle aerosol mass spectrometer (SP-AMS) and auxiliary measurements during the Arctic spring 2015, when concentrations are expected to peak. This study presents three months of data using an SP-AMS in the high Arctic. The objectives are to gain better insight into the processes influencing the chemical composition of high Arctic aerosols and to allocate potential sources and source regions. The ~~latter~~  is investigated through positive matrix

140 factorization (PMF) of the organic aerosol mass spectra from ~~the~~ SP-AMS.

## 2 Experimental

### 2.1 Sampling site

The atmospheric measurements were carried out at VRS located at the Danish military station, Station Nord in North Greenland (Figure S1,  $81^\circ 36' \text{N}$ ,  $16^\circ 40' \text{W}$ , 24 m above mean sea level). VRS is situated

145 in a region with a dry and cold climate where the annual precipitation is 188 mm and the annual mean temperature is  $-21^\circ \text{C}$ . The dominating wind direction is southwestern with an average wind speed of  $4 \text{ m s}^{-1}$  as apparent from Figure S1 (Rasch et al., 2016; Nguyen et al., 2013). The SP-AMS data were sampled in an atmospheric observatory containing two laboratories whereas data from a multi-angle absorption photometer (MAAP) and a filter pack sampler ~~was~~ collected in a smaller co-located hut

150 (Flygers hut) - both equipped with particle and gas inlets. The two measurement sites are located 2.5 km southeast of the military station and are only 300 meters apart. Given the close proximity of the two laboratories and the lack of ~~hyper-local~~ ~~sources~~, we expect both to sample largely the same air mass. A high-volume sampler (HVS) **provided filter samples for off-line analysis**. The HVS was located at the



outskirts of the military station, hence 2.5 km from the main sampling site. All particulate measurements  
155 in the Atmospheric Observatory were conducted by drawing air through a slightly heated (absolute 5 °C)  
particle inlet custom-built by TROPOS. Sampling took place during a campaign within CRAICC  
(Cryosphere-Atmosphere Interactions in a Changing Arctic Climate) and extended over a three months  
period from 20 February until 23 May 2015.

## 2.2 The soot-particle aerosol mass spectrometer

160 An SP-AMS (Aerodyne Research Inc.) was deployed at VRS for measuring mass concentration and  
chemical composition of submicrometer aerosols with a time resolution of two minutes. The SP-AMS is  
described in detail elsewhere (Onasch et al., 2012). In brief, the instrument samples aerosols into a  
vacuum chamber through an aerodynamic particle lens, which creates a narrow particle beam. In the  
vacuum chamber, the aerosols accelerate to a velocity depending on their vacuum aerodynamic diameter  
165 enabling analysis of the aerosol size distribution. Subsequently, the aerosols undergo vaporization,  
ionization with 70 eV electron impact, and detection with time-of-flight mass spectrometry. The  
vaporization in the SP-AMS can occur in two ways: (1) impaction on a tungsten surface at a temperature  
of 600 °C, or (2) intersection with the beam of a continuous-wave 1064 nm intracavity Nd:YAG laser.  
The laser extends the application of the AMS to include refractory particulate matter (R-PM) since it  
170 enables vaporization of strongly infrared light absorbing particles, such as refractory BC (Onasch et al.,  
2012). In this study, high-resolution (HR) mass concentrations of SO<sub>4</sub><sup>2-</sup>, NO<sub>3</sub><sup>-</sup>, NH<sub>4</sub><sup>+</sup>, organics, Cl and  
rBC are obtained from the SP-AMS.

The SP-AMS was operated in two minutes laser off and two minutes laser on in V-mode and alternated  
between the mass spectrum mode and the particle time-of-flight (pToF) to obtain submicrometer particles  
175 (PM<sub>1</sub>) and particle size distribution, respectively. Non-refractory species are reported for time periods  
where the laser was off. The flow rate was inspected with a Gilian Gilibrator (Sensidyne) and pToF size  
calibration with ammonium nitrate particles was performed at the beginning and at the end of the field  
study. During the first part of the campaign, ionization efficiency (IE) calibrations with ammonium  
nitrate particles were conducted on a weekly basis and during the last part every second week. To  
180 establish the detection limit and to enable adjustments of the fragmentation tables a high-efficiency  
particulate air (HEPA) filter was applied on a daily basis for a period of 30 to 60 minutes with a time  
resolution of 2 minutes. The lower detection limit of the different species was determined as three times  
the standard deviation of the mass concentration during the HEPA filter periods (Table 1). The data were  
analyzed with the standard AMS Igor Pro-based (version 6.35 Wavemetrics, Inc) software tools  
185 SQUIRREL (version 1.57G) and PIKA (version 1.16H), available at [http://cires1.colorado.edu/jimenez-  
group/ToFAMSResources/ToFSoftware/index.html](http://cires1.colorado.edu/jimenez-group/ToFAMSResources/ToFSoftware/index.html). The analysis followed the principles described in  
DeCarlo et al. (2006), Jimenez et al. (2003); Allan et al. (2004) and Onasch et al. (2012).

The default relative ionization efficiency (RIE) values for OA, SO<sub>4</sub><sup>2-</sup>, NO<sub>3</sub><sup>-</sup>, NH<sub>4</sub><sup>+</sup> and Cl of 1.4, 1.2, 1.1,  
4 and 1.3, respectively, were applied, which are based on Canagaratna et al. (2007). It should be noted  
190 that chloride reported in the current study is measured with laser off and is thus non-refractory chloride  
and largely excludes refractory species such as chloride in sea salt aerosols. Thus, reported Cl in this



study is most likely primarily a sum of organic Cl and  $\text{NH}_4\text{Cl}$  due to the acidic environment at VRS. However, the partitioning of chloride between different species has not been investigated further, since it is not within the scope of this study. A RIE for rBC of 0.46 was found from calibrations with Regal Black (a commercial carbon black). The appropriateness of this RIE for ambient Arctic rBC is discussed further below (Section 2.4). Calibrations with Regal Black and ammonium nitrate were done with the same frequency. Fragment ions from organic species can overlap with some of the marker ions for rBC. To minimize the organic contribution to the nominal rBC signal (especially at  $\text{C}_1^+$  an organic contribution was evident),  $\text{C}_3^+$  was used to quantify rBC. Thus, the  $\text{C}_3^+$  signal was scaled with a factor of 1/0.55 to match the fraction in the Regal Black mass spectra (Martinsson et al., 2015). The applied collection efficiency (CE) for non-refractory PM and rBC will be discussed in more detail in a subsequent section.

### 2.3 Auxiliary equipment

The aerosol light absorption was measured using a MAAP (Model 5012 Thermo Scientific) operated at a flow rate of  $1 \text{ m}^3 \text{ hour}^{-1}$  with an inlet without a size cut-off. Aerosols were sampled on a filter in which the light absorption at 670 nm was measured by a photometer. Detailed information about the instrument can be found in Petzold and Schonlinner (2004) and previous MAAP measurements from VRS are published in Massling et al. (2015). The BC concentration is determined from the relationship between the aerosol light absorption coefficient and a specific aerosol absorption coefficient (Petzold and Schonlinner, 2004). The specific absorption coefficient describes BCs ability to absorb solar radiation at a specific wavelength, which depends on the age of the aerosol (Petzold et al., 1997; Sharma et al., 2002) and is often determined based on correlations with thermal-optical measurements of elemental carbon (EC) (Sharma et al., 2004). In this study, the MAAP's default value of  $6.6 \text{ m}^2/\text{g}$  has been applied based on Massling et al. (2015). Uncertainty in the conversion factor likely impacts the reported absolute concentrations, but not the temporal variability. In addition, a scanning mobility particle sizer (SMPS) measured the particle number size distribution, which was used for validating the SP-AMS results. Description of validation can be found in Supporting Information.

### 2.4 Comparison between instruments

A collection efficiency (CE) adjustment is normally applied to AMS data, which accounts for particle loss in the instrument caused by the inlet and the aerodynamic lens, beam divergence, and particle bounce effects (Canagaratna et al., 2007; Onasch et al., 2012). In this study, the parameterization developed by Middlebrook et al. (2012) has been used where a time dependent CE is determined based on the aerosols chemical composition. Previous studies have shown an increasing CE with particle acidity, the content of nitrate, and relative humidity (Quinn et al., 2006; Jayne et al., 2000; Matthew et al., 2008). The time dependent CE varied with the majority of values between 0.8 and 1 (Figure S2). In this study, the high CE was due to acidic aerosols. This is also evident from Figure S3.a showing that the theoretical predicted  $\text{NH}_4^+$  concentration necessary for neutralizing the mass concentration of inorganic anions is much larger than the actual  $\text{NH}_4^+$  concentration measured by the SP-AMS (slope = 0.15). The acidity is explained by the high amount of sulfuric acid.



Applying the RIE for rBC of 0.46 determined from Regal Black calibrations, a good correlation between  
230 rBC and  $BC_{MAAP}$  is found (Figure S3.b). While there is a strong linear relationship between the two ( $R^2$   
= 0.83), the  $BC_{MAAP}$  was about three times  than the SP-AMS rBC (slope =  $0.33 \pm 0.02$ ). This  
indicates that the actual RIE for rBC was lower than the value of 0.46 determined during laboratory  
calibrations. A lower RIE can be explained by different particle size and a more complex morphology of  
the Arctic soot compared to the Regal Black used for calibration. An effective RIE is determined for rBC  
235 by forcing the SP-AMS measurements to match the MAAP measurements. For rBC an effective RIE of  
0.15 (=  $0.33 * 0.46$ ) is hence applied in this study.

Comparison of the total  $PM_{10}$  mass concentration (sum of OA,  $SO_4^{2-}$ ,  $NH_4^+$ ,  $NO_3^-$ ,  $Cl^-$  and rBC) with the  
calculated total volume from the SMPS assuming spherical particles was carried out to validate the SP-  
AMS results. The SMPS was operated to characterize particles having mobility diameters between 9 and  
240 870 nm. This corresponds to a larger size range than sampled by the SP-AMS, which has 100 %  
transmission efficiency within aerodynamic diameters between 70 and 600 nm, and adjustment from  
aerodynamic diameter to mobility diameter further brings the SP-AMS into the SMPS range (DeCarlo  
et al., 2006; Allan et al., 2003). However, previous studies (Nguyen et al., 2016; Lange et al., 2018) have  
shown that the dominant particle size range at VRS during winter and spring months is within detection  
245 range of the SP-AMS. Thus, the number of particles from the SMPS exceeding the size  measured  
by the SP-AMS should be relatively small and thereby not influence the results, since particles in the  
lower end of the size distribution do not significantly contribute to volume. There was a generally  
reasonable temporal correspondence between the two measurements. Although there were some periods  
where they differed notably  were within the expected range given the accuracy of the two instruments.  
250 A more detailed discussion about the comparison between the two instruments is presented in Supporting  
Information (Figure S5).

## 2.5 Positive Matrix Factorization

PMF analysis (Paatero, 1997; Paatero and pper, 1994; Lanz et al., 2007; Ulbrich et al., 2009) was  
conducted on the organic mass spectra time-dependent concentration to determine OA factors, which can  
255 be linked to the different sources of OA. The analysis was carried out with the PMF Evaluation Tool  
Software (PET, v2.08D; available online at [http://cires1.colorado.edu/jimenez-  
group/wiki/index.php/PMF-AMS\\_Analysis\\_Guide](http://cires1.colorado.edu/jimenez-group/wiki/index.php/PMF-AMS_Analysis_Guide)) on a mass spectra consisting of HR ions with  $m/z$   
values from 12 to 100. The detailed procedure is described elsewhere (Ulbrich et al., 2009; Zhang et al.,  
2011). The input HR mass spectra and error matrix with the appropriate ion fragments were generated in  
260 PIKA, where the error matrix was calculated as the sum of the quadrature of the electronic noise and  
Poisson counting for each ion (Allan et al., 2003). Isotopes were removed from both the data and error  
matrix since they would give additional weight to the parent ion in the PMF analysis.

As described in Ulbrich et al. (2009) “weak” ions with a signal-to-noise ratio (SNR) between 0.2 and 2  
were down-weighted by a factor of 2 whereas “bad” ions with a SNR below 0.2 were removed from the  
265 data and error matrix. The PMF was executed in exploration mode with a range of factors (between 1  
and 5). The robustness of the solutions were tested by setting different random starting points (SEED: 0



to 10, steps = 1) (Zhang et al., 2011). The detailed procedures for choosing the best solution were based on Zhang et al. (2011). A solution with three factors was identified after evaluating  $Q/Q_{\text{exp}}$  and residuals, interpreting the mass spectra and investigating the temporal correlation between the factor time series and potential tracer species (Ulbrich et al., 2009; Zhang et al., 2011). FPEAK and seed values were changed to test the stability of the three-factor solution and based on the diagnostic plots a three-factor solution was selected with a FPEAK and seed value of zero (Figure S7). A 4-factor solution was scientifically not meaningful with respect to chemistry and returned an O/C ratio  $\gg 1$  for one of the factors. Hence we do not observe a fourth “continental” factor, which has been previously observed during the ASCOS cruise track in the summer/autumn season around Svalbard (Chang et al., 2011). If present, the continental factor is most likely of negligible abundance for which reason the PMF-analysis cannot differentiate it from other Oxygenated Organic Aerosol (OOA). Detailed information regarding the factor combination can be found in Supporting Information.

### 3 Results and Discussion

#### 3.1 Time series

Time dependent OA,  $\text{SO}_4^{2-}$ ,  $\text{NO}_3^-$ ,  $\text{NH}_4^+$ , Cl<sub>2</sub> and rBC concentrations [ $\mu\text{g m}^{-3}$ ] measured by the SP-AMS are presented in Figure 1 together with temperature [ $^{\circ}\text{C}$ ], mean wind speed [m/s], and wind direction [ $^{\circ}$ ] for the time period 21 February to 23 May 2015. Weekly average concentrations from the SP-AMS can be found in Figure S6. Figure 1c shows the time dependent mass fraction of the different species. The total measured  $\text{PM}_{10}$  concentration during the field study is relatively high, averaging  $2.3 \mu\text{g m}^{-3}$ . It should be emphasized that this average does not consider particulate water, NaCl, and elements such as K, Ca, Si, Al and Fe. These elements may additionally contribute  $0.1 - 0.2 \mu\text{g m}^{-3}$  to  $\text{PM}_{10}$  (Nguyen et al., 2013; Heidam et al., 2004). The measurement period covers the Arctic late winter and spring where high aerosol loadings are expected due to the favorable conditions for long-range transport of aerosols from mid-latitudes and slow particle removal rates. With regard to  $\text{PM}_{10}$  concentration we hence observe the typical Arctic haze phenomenon. Generally, the area around VRS is dominated by winds from southwest (Nguyen et al., 2013), which is also evident during this campaign (Figure S1). As expected no diurnal pattern is observed for any of the chemical species indicating that the aerosols are regional and likely predominately from long-range transport.

During the entire campaign,  $\text{SO}_4^{2-}$  is the dominant species that on average makes up almost 70% of the  $\text{PM}_{10}$  mass concentration measured by the SP-AMS (average  $1.5 \mu\text{g m}^{-3}$ , Figure 1-b-c). This is in accordance with previous findings for  $\text{SO}_4^{2-}$  at VRS based on measurements with lower time-resolution (Nguyen et al., 2013; Fenger et al., 2013; Heidam et al., 2004). Atmospheric  $\text{SO}_4^{2-}$  is mainly formed as secondary inorganic aerosols and only a minor fraction is from primary emissions (Massling et al., 2015). Secondary  $\text{SO}_4^{2-}$  is dominated by atmospheric oxidation of sulfur dioxide ( $\text{SO}_2$ ) and to a minor extent DMS (as the long-range transport is occurring over sea ice), and is dependent on the oxidative capacity of the atmosphere e.g. the concentration of hydroxyl radicals ( $\text{OH}$ ). Secondary long-range transported  $\text{SO}_4^{2-}$  depends on atmospheric oxidation of  $\text{SO}_2$  at its source region whereas local transformation (close





to VRS) of SO<sub>2</sub> leads to higher concentration of SO<sub>4</sub><sup>2-</sup> from March, where solar radiation is sufficient  
305 with peak radiation exceeding 100 W/m<sup>2</sup> (Figure 3). This is consistent with results reported from other  
Arctic sites (Quinn et al., 2007; Gong et al., 2010; Heidam et al., 2004; Skov et al., 2017). Previous  
studies suggest that the main source of SO<sub>2</sub> and SO<sub>4</sub><sup>2-</sup> at VRS is long-range transport of anthropogenic  
emissions mainly originating from Siberia (Heidam et al., 2004; Nguyen et al., 2013). In winter and early  
310 spring, direct emissions of sea-salt sulfate and photo-oxidation of oceanic emissions of DMS were  
expected to play a minor role since the ocean surrounding VRS is frozen at that time of the year (Heidam  
et al., 2004). From the beginning of April, the sea ice extent of the Northern Hemisphere is markedly  
reduced, and at the same time solar radiation increases (Figure 3). In this period, we observe MSA as an  
ion in the SP-AMS at *m/z* 78.9854. MSA is formed by atmospheric oxidation of DMS, which results  
315 from bacterial breakdown of dimethylsulfoniopropionate produced by marine phytoplankton and  
microalgae (Carpenter et al., 2012). DMS emerges steadily and peaks in the end of April (see Section  
3.2). Oxidation of DMS may involve the hydroxyl radical, ozone, and halogen radicals such as Cl and  
BrO (Barnes et al., 2006; Hoffmann et al., 2016).

In this study, the OA fraction is the second largest contributor to PM<sub>1</sub> with an average concentration of  
0.6 µg m<sup>-3</sup>. Weekly averages showed a clear decrease from mid-April relative to the spring season  
320 concentrations (Figure 1). The OA time dependent concentration shows relatively large peaks during  
shorter time periods, which in some cases can be attributed to a change in wind direction from  
Southwesterly to Northerly winds (around 10°, Figure S1). While these wind directions were registered  
on a few occasions they potentially provided local pollution from the military station located three  
kilometers away from the measurement site. These peaks have not been discarded and the impacts of  
325 local pollution will be discussed further in Section 3.2.

Particulate NH<sub>4</sub><sup>+</sup> is found in much lower concentrations compared to OA and SO<sub>4</sub><sup>2-</sup> with an average  
concentration of 0.09 µg m<sup>-3</sup>. For the campaign, a significant correlation is found between SO<sub>4</sub><sup>2-</sup> and  
NH<sub>4</sub><sup>+</sup>. However, it is known that SO<sub>4</sub><sup>2-</sup> and NH<sub>4</sub><sup>+</sup> do not originate from the same sources. SO<sub>2</sub>, a key  
precursor to SO<sub>4</sub><sup>2-</sup>, originates from combustion of fossil fuel and is oxidized to SO<sub>4</sub><sup>2-</sup> in the atmosphere.  
330 In contrast, ammonia (NH<sub>3</sub>) which is the precursor of NH<sub>4</sub><sup>+</sup>, derives largely from long-range transport  
from farms and more locally from sea bird colonies (Croft et al., 2016). The strong correlation between  
SO<sub>4</sub><sup>2-</sup> and NH<sub>4</sub><sup>+</sup> (R<sup>2</sup> = 0.70) suggests that the activity of the particles is reasonably constant with time.  
This is furthermore in agreement with the general assumption that NH<sub>4</sub><sup>+</sup> is bound irreversibly to SO<sub>4</sub><sup>2-</sup>  
(e.g. Seinfeld and Pandis, 1998), in this case as ammonium bisulfate. Particle-bound NH<sub>4</sub><sup>+</sup> has a much  
335 longer lifetime than NH<sub>3</sub> therefore it is transported as NH<sub>4</sub><sup>+</sup> even to the high Arctic.

The average concentration of NO<sub>3</sub><sup>-</sup> and Cl and 0.02 µg m<sup>-3</sup>, respectively, which is close to the  
detection limits. These concentration levels are lower compared to what has previously been observed at  
VRS (Fenger et al., 2013; Heidam et al., 2004). However, the SP-AMS does not measure refractory  
chlorine species, such as NaCl. Moreover, Fenger et al. (2013) found that the overall size distribution of  
340 chloride and NO<sub>3</sub><sup>-</sup> differed from SO<sub>4</sub><sup>2-</sup>, with Cl and NO<sub>3</sub><sup>-</sup> mainly found in supermicrometer particles (>  
1 µm) not detectable by SP-AMS. These particles were suggested to originate from local/regional sources  
(frost flowers). Only during certain periods with specific wind directions NO<sub>3</sub><sup>-</sup> and Cl were found in

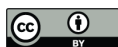

accumulation mode particles, which were ascribed to long-range transported particles (Fenger et al., 2013).

345 The average rBC concentration of  $0.1 \mu\text{g m}^{-3}$  is above the lower detection limit ( $0.01 \mu\text{g m}^{-3}$ ) and the highest rBC loadings are found in the first month of the campaign (February). As with OA, some of the spikes in the rBC time series are related to a change in wind direction and likely the result of local pollution from the military station. All data are included here and missing time periods of rBC (during April and May) are due to technical problems with the SP-AMS laser. BC is primarily emitted from both anthropogenic and natural combustion sources (Bond et al., 2013). Upon emission, aerosols containing BC grow by condensation and coagulation into the accumulation mode. Particles in the accumulation mode have the longest lifetime with respect to dry deposition and thus particles can be transported over longer distances during the Arctic haze period when precipitation is scarce (Bond et al., 2013; AMAP, 2011; Massling et al., 2015). These accumulation mode BC-containing particles may serve as cloud seeds in the late spring, when precipitation begins to be important in the Arctic (Garrett et al., 2011). Further, condensational growth of the BC-containing particles may increase the absorption by these particles (Cappa et al., 2012; Liu et al., 2015). Previous studies have found a correlation between BC and  $\text{SO}_4^{2-}$  at different Arctic stations (Massling et al., 2015; Eckhardt et al., 2015; Hirdman et al., 2010). These studies suggest that the two species are internally mixed and possibly undergo similar transport patterns. Furthermore, comparable correlation slopes were found for the different Arctic locations, which suggests that source regions of BC and  $\text{SO}_4^{2-}$  are similar for the entire Arctic. An even more recent study suggests that only a minor part of ambient aerosols contained rBC inclusions (Kodros et al., 2018). We also find a significant correlation between the two species (students t-test, level of significance 99.995), consistent with previous studies. However, we also find that the  $R^2$  value is relatively low (0.18). The reason for this is that there are periods with particularly high rBC concentrations, likely originating from local emission sources (e.g. the military base), which will be investigated further in the following section. Additionally, in April and May from DMS oxidation will make up a larger fraction of total  $\text{SO}_4^{2-}$ , and thereby reduce the ratio between rBC and  $\text{SO}_4^{2-}$ , which is also evident from Figure S4.

### 3.2 Source Apportionment

370 The PMF analysis was conducted for the HR OA mass spectra with one to five PMF factors and a three-factor solution was chosen (more details can be found in Supporting Information). Figure 2 shows the mass spectral profiles of the three different factors for the entire campaign period. Figure 3 illustrates time series for the factors and Table 2 shows the correlation of each factor with tracer species, respectively. Figure 4 illustrates the average mass concentration ( $\mu\text{g m}^{-3}$ ) and the mass fraction of the factors in February, March, April and May. The PMF analysis yielded three factors: 1) a hydrocarbon-like organic aerosol factor (HOA), 2) an oxygenated Arctic haze organic aerosol factor (AOA) dominating winter and early spring, and 3) a more oxygenated marine organic aerosol factor (MOA) which builds up in late spring and becomes the dominating OA throughout late spring. The identification of these factors is discussed below.



380 The HOA factor is characterized by hydrocarbon fragments especially at  $m/z$  41, 43, 55, 57, 67, 69 and  
71 ( $C_3H_5^+$ ,  $C_3H_7^+$ ,  $C_4H_7^+$ ,  $C_4H_9^+$ ,  $C_5H_7^+$ ,  $C_5H_9^+$ ,  $C_5H_{11}^+$ , respectively) from chemically reduced organic  
emissions. The O/C ratio of 0.11, high signal at  $m/z$  57 and the absence of  $CO_2^+$  is a characteristic of  
primary combustion sources of fossil origin, which is similar to other HOA factors found in previous  
studies (Zhang et al., 2005; Aiken et al., 2009) and at other Arctic locations (Frossard et al., 2011). The  
385 very small contribution of the  $CO_2^+$  ion at  $m/z$  = 44 and the very small abundances of typical biomass  
burning OA (BBOA) marker ions at  $m/z$  60 ( $C_2H_4O_2^+$ ) and  $m/z$  73 ( $C_3H_5O_2^+$ ) in the HOA factor spectrum  
suggests that the HOA factor is not mixed with BBOA. This finding is consistent with previous results  
that indicate BBOA levels are typically very low, based on measurements of levoglucosan in the Arctic,  
(Zangrando et al., 2013). The time series of HOA and rBC showed a moderate correlation ( $R^2 = 0.35$ ),  
390 which is consistent with the HOA factor being of primary origin. The relatively low  $R^2$  value (Table 2)  
can be partly explained by rBC being internally mixed with  $SO_4^{2-}$  and transported with the AOA factor.  
The HOA time series is generally higher in concentration at the beginning of the measurement period  
(Figure 4). The time series of HOA reveals a number of shorter periods with high mass loading, which  
could be caused by local pollution from the military station 2 km north of the measurement site due to a  
395 change in wind direction, or exhaust plumes from snow scooters and heavy-duty vehicles occasionally  
clearing the road nearby the measurement station for snow (see windrose, Figure S1). It is not trivial to  
distinguish local events and in this case the possible local contamination was investigated by comparing  
high HOA peaks ( $> 0.45 \mu g m^{-3}$ ) with size distribution measurements from the SMPS (Lange et al.,  
2018). Periods which were attributed to local contamination accounted for less than 1% of OA  
400 concentration. Therefore, essentially the entire HOA concentration is assigned to long-range  
transportation, possibly sources with different ratios of HOA and rBC which would explain the moderate  
correlation between HOA and rBC.

The AOA is the most abundant factor from the beginning of the campaign through mid-April and  
accounts for 64% of OA mass for the entire field study (Figure 2b). The  $CO_2^+$  ion contributes notably to  
405 the mass spectrum and the O:C is 0.63, indicating that this factor is likely secondary in origin. The  
dominating OA during the Arctic haze period is thus SOA, which results from long-range transport into  
the region during winter/spring. AOA is abundant during February to mid-April though lower  
concentrations are observed around middle of March. At the end of April and onwards the factor  
essentially disappears, which is in agreement with increasing wet deposition in the spring and a  
410 contracting polar dome impairing long-range transport into North Greenland (Abbatt et al., 2018).  
Generally, an OOA factor mainly consists of SOA but can also include oxygenated organic species from  
primary emissions (Zhang et al., 2005). In this case the AOA factor correlates significantly (level 99.995)  
with  $SO_4^{2-}$ , which is mainly formed by atmospheric oxidation of  $SO_2$  suggesting the main part of the  
factor being SOA. The correlation is especially good until mid-April after which  $SO_4^{2-}$  begins to correlate  
415 with MOA. The O/C ratio of 0.63 also indicates a less oxidized and fresher SOA factor, or an SOA  
formed from generally larger precursor VOCs, similar to what has been found in previous studies (O/C  
between 0.52 – 0.64, (Aiken et al., 2008)). The AOA mass spectrum also included mass spectral peaks  
at  $m/z$  60.021 ( $C_2H_4O_2^+$ ) and 73.029 ( $C_3H_5O_2^+$ ). These fragments are often taken as being indicative of



420 anhydrous sugar such as levoglucosan, and thereby suggest that biomass burning makes some  
contribution to Arctic OA. However, in this study biomass burning cannot be verified, since the  
abundance of  $C_2H_4O_2^+$  did not exceed the expected contribution from SOA (Nelson et al., 2008; Aiken et  
al., 2009; Cubison et al., 2011; Lee et al., 2010; Saarnio et al., 2013). Biomass burning is generally  
assumed to play a significant role in the context of the composition of the Arctic aerosol (Stohl et al.,  
2013) where a recent publication using isotopes of carbon reports biomass burning or biofuel use to  
425 account for up to 57% of EC at the Arctic station Zeppelin at Svalbard during high pollution events in  
winter (Winiger et al., 2015). However, levoglucosan is prone to atmospheric oxidation by hydroxide  
radicals (OH) (Hennigan et al., 2010; Hoffmann et al., 2010), which could degrade the markers during  
transport to North Greenland. This can explain the low abundance of levoglucosan markers measured in  
this study.

430 The MOA factor has a mass spectrum dominated by  $m/z$  28 and 44 ( $CO^+$  and  $CO_2^+$ ), that is a more  
oxygenated OA factor due to the presence of e.g. organic acids and acid derived species, such as esters  
(Duplissy et al., 2011). A high O/C-ratio of 0.95 reveals that the factor is highly oxidized and  
photochemically aged. The MOA spectrum resembles a marine organic plume previously published from  
Mace Head, Ireland containing both primary and secondary organic aerosols of marine origin  
435 (Ovadnevaite et al., 2011). This spectrum and MOA in this study are different from the marine organic  
aerosol factor published during the ASCOS expedition in the Central Arctic Ocean (Chang et al., 2011),  
which shows a closer resemblance with the mass spectrum of pure MSA. In the MSA spectrum,  $m/z$  15,  
48, 64 and 79 are dominating peaks, which was also observed in the marine factor from the ASCOS  
expedition. The distinct peak at  $m/z$  78.9854 is specific for MSA (Huang et al., 2017), and reveals that  
440 MOA has a secondary biogenic source (Becagli et al., 2013). The resemblance of MOA from this study  
with the mass spectrum from Mace Head indicates, that MOA is not solely a secondary marine source,  
but is most likely also composed by primary marine organic aerosols e.g. from sea spray (Ovadnevaite  
et al., 2011; Fu et al., 2015).

Figure 3 and 4 illustrates HOA and AOA decreasing around mid-April, while MOA builds up from the  
445 end of March. In 2015, Arctic sunrise onset at February 28<sup>th</sup> at VRS, where the sun became visible for a  
few minutes, only, above the mountains at the horizon. Polar daytime initiates photochemistry and hence  
the production of OH radicals (Seinfeld and Pandis, 2006) and reactive halogen radicals (Hoffmann et  
al., 2016; Barnes et al., 2006). From mid-April, the sun is above the horizon all day until the beginning  
of September. Still solar radiation varies over the day and hence the OH production. In contrast, the  
450 concentration of OH during build up of Arctic haze is correspondingly low with ozone being the major  
oxidant during the dark winter. In Figure 3, the daily averaged solar radiation ( $W\ m^{-2}$ ) and sea ice extent  
( $km^2$ ) on the Northern Hemisphere are shown together with the time series of MOA. While MOA is less  
abundant during February and March, this factor greatly increases in April, when radiation exceeds  
approximately  $100\ W\ m^{-2}$ . In April, the highest OA concentrations is observed where AOA accounts for  
455 around 70% of OA (Figure 4). In May, MOA becomes the dominating OA while AOA nearly disappears.  
At the same time we observe the lowest concentration of OA consisting of 75% MOA (Figure 4). This  
is significantly higher than observed at Alert (Narukawa et al., 2008). Until the beginning of April, the



sea ice extent is constant at around 14.5 million km<sup>2</sup> on the Northern Hemisphere (Figure 3). Hereafter, about a month after the onset of polar daytime, the sea ice surface area starts to decline. After 6 weeks starting from a constant sea-ice in mid-May, it is reduced by 2 million km<sup>2</sup> corresponding to a 14% loss of ice-covered surface area. Consequently, more open waters allow for higher DMS emissions and atmospheric oxidation of DMS to MSA involving OH. Also open leads and marginal ice zones provide primary marine aerosols (Willis et al., 2018). Indeed, previous findings suggest that biogenic productivity in open oceans and sea ice zones and the emission of DMS are responsible for increased new particle formation, as sea ice pack extent retreats (Dall'Osto et al., 2017). Quinn and co-workers reported increased concentrations of MSA at Barrow from 2000 to 2009 associated with the northward migration of the marginal ice zone (Quinn et al., 2009; Sharma et al., 2012; Laing et al., 2013). Of the four northernmost year-round manned observatories at Alert, Mount Zeppelin, VRS and Barrow, the highest MSA concentrations are measured at Mount Zeppelin, likely due to its proximity to open waters around Svalbard, which are a significant source of DMS from May to August (e.g. Lana et al. (2011)). This contrasts with the ice situation around VRS, which is ice covered most of the year.

Considering the stronger oxidizing environment starting in April, we expect MOA to be abundant until autumn, and possibly co-exist with an emerging continental factor as reported during the ASCOS cruise track in late summer/autumn (Chang et al., 2011). MOA constitutes only 22% of OA on average during our measurement period. However, the radiative impact may be greater than the other OA types because it emerged after polar sunrise and persisted during polar daytime for which reason they are optically active 24 hours a day although solar radiation has a diurnal cycle. However, MOA is by far the most abundant OA from end of April and onwards. The observed transition between AOA and MOA is in agreement with Narukawa et al. (2008), who observed a transition between fossil fuel influenced OA to marine OA. MOA is not only secondary but may contain oxidation products of DMS and other VOCs from oceanic origin, and primary components including colloidal gels et al., 2018; Leck and Bigg, 2005; Orellana et al., 2011). In line with our findings, modelling at several sites in the Canadian Arctic suggested that marine OA may account for more than half of the summertime OA (Croft et al., 2018). Biogenic marine aerosols can scatter solar radiation, which will result in a negative radiative forcing. Biogenic marine aerosols can also coat soot particles, which may be transported from wild fires (AMAP, 2015), which could impact the CCN activity and absorption by the soot particles, with the latter potentially enhancing the warming influence of the particles (Lange et al., 2018). These findings encourage further studies of optical properties and chemical composition and physico-chemical parameters as CCN ability or hygroscopicity of aerosols prevailing during polar daytime.

#### 490 4 Conclusion

In the transition from polar night to polar day we concluded SO<sub>4</sub><sup>2-</sup> to be the most abundant species in submicrometer aerosols averaging 1.5 μg m<sup>-3</sup> during February to May 2015 and decreasing throughout the campaign period. This is in accordance with previous findings from VRS and Svalbard (Udisti et al., 2016) where SO<sub>4</sub><sup>2-</sup> has been apportioned to be 75% anthropogenic, while natural contributions from crustal, sea salt and biogenic sources contributed minorly by 3%, 12% and While not previously



quantified at VRS, OA was found to contribute 22% of measured  $PM_{10}$ . Based on the SP-AMS measurements the submicrometer aerosol mass concentration averaged  $2.3 \mu\text{g m}^{-3}$  during the campaign period. Organic species and  $SO_4^{2-}$  have the potential to condense on and coat black carbon, which averaged  $0.1 \mu\text{g m}^{-3}$ , potentially impacting the CCN activity of and light absorption by BC. However, the chemical composition should be further studied in summer and autumn.

The OA was overall highly oxidized. Source apportionment analysis yielded three factors, identified as a Hydrocarbon-like Organic Aerosol (HOA), Arctic haze Organic Aerosol (AOA) and Marine Organic Aerosol (MOA) with O/C ratios of 0.11, 0.63 and 0.95, respectively. HOA, being the most reduced factor, made up 12% of OA of which 1% of OA was demonstrated to be contamination from the nearby military camp. AOA and MOA made up 86% of OA averaged across the campaign, with AOA averaging 64% and MOA 22% (2% residuals). AOA was most likely secondary while MOA contained both MSA (secondary OA) and a mass spectrum indicating the presence of primary OA as well. The sum of long-range transported HOA and AOA make-up the vast majority of OA during the Arctic haze period. AOA and MOA exhibit distinct temporal variability. The less oxidized AOA builds up during the Arctic haze period and dominates until early spring, during which both the absolute and relative contribution to the OA burden decreases substantially. In contrast, the MOA is nearly non-existent until early spring but is then by far the dominating OA from the end of April and onwards. The fact that MOA emerges at a time where long-range transport is impaired by increased deposition and a contracting polar dome indicates that the sources to this factor are more Arctic regional in nature. This demonstrates the importance of biogenic sources in the Arctic, especially in the spring. In view of changing biogenic processes and corresponding source strengths of aerosol precursors in a changing Arctic climate with changing sea-ice extent, additional high time resolution measurements are urgently needed in order to elucidate the organic components dominating aerosol summer mass and number concentrations.

### Supporting information

Supporting information describes site information, supplementary instruments, collection efficiency, validation of SP-AMS data, and key diagnostics for the PMF solution.

### Author contribution

Ingeborg E. Nielsen and Jacob K. Nøjgaard carried out the field measurements, and Ingeborg did the analysis of the SP-AMS data. Jacob and Ingeborg carried out the PMF analysis and took lead in writing the manuscript. Henrik Skov supervised the project and provided critical feedback, he participated in the fieldcampaign and helped shape the research and manuscript. Heikki Junninen and Nina Sarnela helped monitor the SP-AMS during the field campaign and commented on the manuscript. Sonya Collier, Qi Zhang and Christopher D. Cappa helped interpret the SP-AMS data set and provided critical feedback on the manuscript. Andreas Massling and Robert Lange participated in the fieldcampaign and discussed the analysis and commented on the manuscript. Axel C. Eriksson and Manuel Dall'Osto discussed the analysis and results and commented on the manuscript.

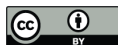

### Acknowledgements

The research was financially supported by the Arctic Centre of Research at Aarhus University, Cryosphere-Atmosphere Interaction in a Changing Arctic Climate (CRAICC), WOOD combustion -  
535 detailed Monitoring related to Acute effects in Denmark (WOODMAD), the Danish Environmental  
Protection Agency with means from the MIKA/DANCEA funds for environmental support to the Arctic  
Region and the Danish Council for Independent Research (project NUMEN, DFF-FTP-4005-00485B).  
Special thanks go to laboratory technician Bjarne Jensen and the staff at Station Nord for great support  
during the field campaign. Sissel Bjørn Svendsen is greatly acknowledged for her data control of the  
540 SMPS data and the Villum Foundation is acknowledged for financing the new research station, Villum  
Research Station, at Station Nord.

### References

- Abbott, P. D., Leaitch, W. R., Aliabadi, A. A., Bertram, A. K., Blanchet, J. P., Boivin-Rioux, A.,  
Božem, H., Burkart, J., Chang, R. Y. W., Charette, J., Chaubey, J. P., Christensen, R. J., Cirisan, A.,  
545 Collins, D. B., Croft, B., Dionne, J., Evans, G. J., Fletcher, C. G., Ghahremaninezhad, R., Girard, E.,  
Gong, W., Gosselin, M., Gourdal, M., Hanna, S. J., Hayashida, H., Herber, A. B., Hesaraki, S., Hoor, P.,  
Huang, L., Husserr, R., Irish, V. E., Keita, S. A., Kodros, J. K., Köllner, F., Kolonjari, F., Kunkel, D.,  
Ladino, L. A., Law, K., Levasseur, M., Libois, Q., Liggio, J., Lizotte, M., Macdonald, K. M., Mahmood,  
R., Martin, R. V., Mason, R. H., Miller, L. A., Moravek, A., Mortenson, E., Mungall, E. L., Murphy, J.  
550 G., Namazi, M., Norman, A. L., O'Neill, N. T., Pierce, J. R., Russell, L. M., Schneider, J., Schulz, H.,  
Sharma, S., Si, M., Staebler, R. M., Steiner, N. S., Galí, M., Thomas, J. L., von Salzen, K., Wentzell, J.  
J. B., Willis, M. D., Wentworth, G. R., Xu, J. W., and Yakobi-Hancock, J. D.: New insights into aerosol  
and climate in the Arctic, *Atmos. Chem. Phys. Discuss.*, 2018, 1-60, <https://doi.org/10.5194/acp-2018-995>, in review, 2018.
- 555 Aiken, A. C., Decarlo, P. F., Kroll, J. H., Worsnop, D. R., Huffman, J. A., Docherty, K. S., Ulbrich, I.  
M., Mohr, C., Kimmel, J. R., Sueper, D., Sun, Y., Zhang, Q., Trimborn, A., Northway, M., Ziemann, P.  
J., Canagaratna, M. R., Onasch, T. B., Alfarra, M. R., Prevot, A. S. H., Dommen, J., Duplissy, J.,  
Metzger, A., Baltensperger, U., and Jimenez, J. L.: O/C and OM/OC ratios of primary, secondary, and  
ambient organic aerosols with high-resolution time-of-flight aerosol mass spectrometry, *Environ. Sci.*  
560 *Technol.*, 42, 4478-4485, <https://doi.org/10.1021/es703009q>, 2008.
- Aiken, A. C., Salcedo, D., Cubison, M. J., Huffman, J. A., DeCarlo, P. F., Ulbrich, I. M., Docherty, K.  
S., Sueper, D., Kimmel, J. R., Worsnop, D. R., Trimborn, A., Northway, M., Stone, E. A., Schauer, J. J.,  
Volkamer, R. M., Fortner, E., de Foy, B., Wang, J., Laskin, A., Shutthanandan, V., Zheng, J., Zhang, R.,  
Gaffney, J., Marley, N. A., Paredes-Miranda, G., Arnott, W. P., Molina, L. T., Sosa, G., and Jimenez, J.  
565 L.: Mexico City aerosol analysis during MILAGRO using high resolution aerosol mass spectrometry at  
the urban supersite (T0) - Part 1: Fine particle composition and organic source apportionment, *Atmos.*  
*Chem. Phys.*, 9, 6633-6653, <https://doi.org/10.5194/acp-9-6633-2009>, 2009.



- Allan, J. D., Jimenez, J. L., Williams, P. I., Alfarra, M. R., Bower, K. N., Jayne, J. T., Coe, H., and Worsnop, D. R.: Quantitative sampling using an Aerodyne aerosol mass spectrometer: 1. Techniques of data interpretation and error analysis, *J. Geophys. Res.: Atmos.*, 108, Artn 4283, <https://doi.org/10.1029/2003jd001607>, 2003.
- Allan, J. D., Delia, A. E., Coe, H., Bower, K. N., Alfarra, M. R., Jimenez, J. L., Middlebrook, A. M., Drewnick, F., Onasch, T. B., Canagaratna, M. R., Jayne, J. T., and Worsnop, D. R.: A generalised method for the extraction of chemically resolved mass spectra from Aerodyne aerosol mass spectrometer data, *J. Aerosol Sci.*, 35, 909-922, <https://doi.org/10.1016/j.jaerosci.2004.02.007>, 2004.
- AMAP: The Impact of Black Carbon on Arctic Climate (2011). By: P.K. Quinn, A. Stohl, A. Arneth, T. Berntsen, J. F. Burkhart, J. Christensen, M. Flanner, K. Kupiainen, H. Lihavainen, M. Shepherd, V. Shevchenko, H. Skov, and V. Vestreng. AMAP Technical Report No. 4 (2011). Arctic Monitoring and Assessment Programme (AMAP), Oslo, 72 pp., 2011.
- AMAP: AMAP Assessment 2015: Black carbon and ozone as Arctic climate forcers, Arctic Monitoring and Assessment Programme (AMAP), Oslo, Norway, vii + 166 pp., 2015.
- AMAP: Snow, Water, Ice and Permafrost in the Arctic (SWIPA) 2017, Arctic Monitoring and Assessment Programme (AMAP), Oslo, Norway, xiv + 269 pp., 2017.
- Andrews, E., Ogren, J. A., Bonasoni, P., Marinoni, A., Cuevas, E., Rodriguez, S., Sun, J. Y., Jaffe, D. A., Fischer, E. V., Baltensperger, U., Weingartner, E., Coen, M. C., Sharma, S., Macdonald, A. M., Leaitch, W. R., Lin, N. H., Laj, P., Arsov, T., Kalapov, I., Jefferson, A., and Sheridan, P.: Climatology of aerosol radiative properties in the free troposphere, *Atmos. Res.*, 102, 365-393, <https://doi.org/10.1016/j.atmosres.2011.08.017>, 2011.
- Barnes, I., Hjorth, J., and Mihalopoulos, N.: Dimethyl sulfide and dimethyl sulfoxide and their oxidation in the atmosphere, *Chem. Rev.*, 106, 940-975, <https://doi.org/10.1021/cr020529+>, 2006.
- Barrett, T. E., Robinson, E. M., Usenko, S., and Sheesley, R. J.: Source Contributions to Wintertime Elemental and Organic Carbon in the Western Arctic Based on Radiocarbon and Tracer Apportionment, *Environ. Sci. Technol.*, 49, 13733-13733, <https://doi.org/10.1021/acs.est.5b05128>, 2015.
- Barrie, L. A., Hoff, R. M., and Daggupaty, S. M.: The Influence of Mid-Latitudinal Pollution Sources on Haze in the Canadian Arctic, *Atmos. Environ.*, 15, 1407-1419, [https://doi.org/10.1016/0004-6981\(81\)90347-4](https://doi.org/10.1016/0004-6981(81)90347-4), 1981.
- Becagli, S., Lazzara, L., Fani, F., Marchese, C., Traversi, R., Severi, M., di Sarra, A., Sferlazzo, D., Piacentino, S., Bommarito, C., Dayan, U., and Udisti, R.: Relationship between methanesulfonate (MS-) in atmospheric particulate and remotely sensed phytoplankton activity in oligo-mesotrophic central





- 600 Mediterranean Sea, Atmos. Environ., 79, 681-688, <https://doi.org/10.1016/j.atmosenv.2013.07.032>, 2013.
- Bond, T. C., Doherty, S. J., Fahey, D. W., Forster, P. M., Berntsen, T., DeAngelo, B. J., Flanner, M. G., Ghan, S., Karcher, B., Koch, D., Kinne, S., Kondo, Y., Quinn, P. K., Sarofim, M. C., Schultz, M. G., Schulz, M., Venkataraman, C., Zhang, H., Zhang, S., Bellouin, N., Guttikunda, S. K., Hopke, P. K.,  
605 Jacobson, M. Z., Kaiser, J. W., Klimont, Z., Lohmann, U., Schwarz, J. P., Shindell, D., Storelvmo, T., Warren, S. G., and Zender, C. S.: Bounding the role of black carbon in the climate system: A scientific assessment, J. Geophys. Res.: Atmos., 118, 5380-5552, <https://doi.org/10.1002/jgrd.50171>, 2013.
- Brock, C. A., Cozic, J., Bahreini, R., Froyd, K. D., Middlebrook, A. M., McComiskey, A., Brioude, J., Cooper, O. R., Stohl, A., Aikin, K. C., de Gouw, J. A., Fahey, D. W., Ferrare, R. A., Gao, R. S., Gore,  
610 W., Holloway, J. S., Hubler, G., Jefferson, A., Lack, D. A., Lance, S., Moore, R. H., Murphy, D. M., Nenes, A., Novelli, P. C., Nowak, J. B., Ogren, J. A., Peischl, J., Pierce, R. B., Pilewskie, P., Quinn, P. K., Ryerson, T. B., Schmidt, K. S., Schwarz, J. P., Sodemann, H., Spackman, J. R., Stark, H., Thomson, D. S., Thornberry, T., Veres, P., Watts, L. A., Warneke, C., and Wollny, A. G.: Characteristics, sources, and transport of aerosols measured in spring 2008 during the aerosol, radiation, and cloud processes affecting Arctic Climate (ARCPAC) Project, Atmos. Chem. Phys., 11, 2423-2453,  
615 <https://doi.org/10.5194/acp-11-2423-2011>, 2011.
- Canagaratna, M. R., Jayne, J. T., Jimenez, J. L., Allan, J. D., Alfarra, M. R., Zhang, Q., Onasch, T. B., Drewnick, F., Coe, H., Middlebrook, A., Delia, A., Williams, L. R., Trimborn, A. M., Northway, M. J., DeCarlo, P. F., Kolb, C. E., Davidovits, P., and Worsnop, D. R.: Chemical and microphysical  
620 characterization of ambient aerosols with the aerodyne aerosol mass spectrometer, Mass Spectrom. Rev., 26, 185-222, <https://doi.org/10.1002/mas.20115>, 2007.
- Cappa, C. D., Onasch, T. B., Massoli, P., Worsnop, D. R., Bates, T. S., Cross, E. S., Davidovits, P., Hakala, J., Hayden, K. L., Jobson, B. T., Kolesar, K. R., Lack, D. A., Lerner, B. M., Li, S.-M., Mellon, D., Nuaaman, I., Olfert, J. S., Petäjä, T., Quinn, P. K., Song, C., Subramanian, R., Williams, E. J., and  
625 Zaveri, R. A.: Radiative absorption enhancements due to the mixing state of atmospheric black carbon, Science, 337, 1078-1081, <https://doi.org/10.1126/science.1223447>, 2012.
- Carpenter, L. J., Archer, S. D., and Beale, R.: Ocean-atmosphere trace gas exchange, Chem. Soc. Rev., 41, 6473-6506, <https://doi.org/10.1039/c2cs35121h>, 2012.
- Chang, R. Y. W., Leck, C., Graus, M., Muller, M., Paatero, J., Burkhardt, J. F., Stohl, A., Orr, L. H.,  
630 Hayden, K., Li, S. M., Hansel, A., Tjernstrom, M., Leaitch, W. R., and Abbatt, J. P. D.: Aerosol composition and sources in the central Arctic Ocean during ASCOS, Atmos. Chem. Phys., 11, 10619-10636, <https://doi.org/10.5194/acp-11-10619-2011>, 2011.



- Christensen, J. H.: The Danish eulerian hemispheric model — a three-dimensional air pollution model used for the arctic, *Atmos. Environ.*, 31, 4169-4191, [https://doi.org/10.1016/s1352-2310\(97\)00264-1](https://doi.org/10.1016/s1352-2310(97)00264-1), 1997.
- 635
- Croft, B., Wentworth, G. R., Martin, R. V., Leaitch, W. R., Murphy, J. G., Murphy, B. N., Kodros, J. K., Abbatt, J. P. D., and Pierce, J. R.: Contribution of Arctic seabird-colony ammonia to atmospheric particles and cloud-albedo radiative effect, *Nat. Commun.*, 7, Artn 13444, <https://doi.org/10.1038/ncomms13444>, 2016.
- 640
- Croft, B., Martin, R. V., Leaitch, W. R., Burkart, J., Chang, R. Y. W., Collins, D. B., Hayes, P. L., Hodshire, A. L., Huang, L., Kodros, J. K., Moravek, A., Mungall, E. L., Murphy, J. G., Sharma, S., Tremblay, S., Wentworth, G. R., Willis, M. D., Abbatt, J. P. D., and Pierce, R. P.: Arctic marine secondary organic aerosol contributes significantly to summertime particle size distributions in the Canadian Arctic Archipelago, *Atmos. Chem. Phys. Discuss.*, <https://doi.org/doi.org/10.5194/acp-2018-895>, in review, 2018.
- 645
- Cubison, M. J., Ortega, A. M., Hayes, P. L., Farmer, D. K., Day, D., Lechner, M. J., Brune, W. H., Apel, E., Diskin, G. S., Fisher, J. A., Fuelberg, H. E., Hecobian, A., Knapp, D. J., Mikoviny, T., Riemer, D., Sachse, G. W., Sessions, W., Weber, R. J., Weinheimer, A. J., Wisthaler, A., and Jimenez, J. L.: Effects of aging on organic aerosol from open biomass burning smoke in aircraft and laboratory studies, *Atmos. Chem. Phys.*, 11, 12049-12064, <https://doi.org/10.5194/acp-11-12049-2011>, 2011.
- 650
- Dall'Osto, M., Beddows, D. C. S., Tunved, P., Krejci, R., Strom, J., Hansson, H. C., Yoon, Y. J., Park, K. T., Becagli, S., Udisti, R., Onasch, T., O'Dowd, C. D., Simo, R., and Harrison, R. M.: Arctic sea ice melt leads to atmospheric new particle formation, *Sci Rep-Uk*, 7, ARTN 3318, <https://doi.org/10.1038/s41598-017-03328-1>, 2017.
- 655
- DeCarlo, P. F., Kimmel, J. R., Trimborn, A., Northway, M. J., Jayne, J. T., Aiken, A. C., Gonin, M., Fuhrer, K., Horvath, T., Docherty, K. S., Worsnop, D. R., and Jimenez, J. L.: Field-deployable, high-resolution, time-of-flight aerosol mass spectrometer, *Anal. Chem.*, 78, 8281-8289, <https://doi.org/10.1021/ac061249n>, 2006.
- 660
- Dillner, A. M., Phuah, C. H., and Turner, J. R.: Effects of post-sampling conditions on ambient carbon aerosol filter measurements, *Atmos. Environ.*, 43, 5937-5943, <https://doi.org/10.1016/j.atmosenv.2009.08.009>, 2009.
- Drewnack, F., Hings, S. S., DeCarlo, P., Jayne, J. T., Gonin, M., Fuhrer, K., Weimer, S., Jimenez, J. L., Demerjian, K. L., Borrmann, S., and Worsnop, D. R.: A new time-of-flight aerosol mass spectrometer (TOF-AMS) - Instrument description and first field deployment, *Aerosol Sci. Technol.*, 39, 637-658, <https://doi.org/10.1080/02786820500182040>, 2005.
- 665



- 670 Duplissy, J., DeCarlo, P. F., Dommen, J., Alfarra, M. R., Metzger, A., Barmapadimos, I., Prevot, A. S. H., Weingartner, E., Tritscher, T., Gysel, M., Aiken, A. C., Jimenez, J. L., Canagaratna, M. R., Worsnop, D. R., Collins, D. R., Tomlinson, J., and Baltensperger, U.: Relating hygroscopicity and composition of organic aerosol particulate matter, *Atmos. Chem. Phys.*, 11, 1155-1165, <https://doi.org/10.5194/acp-11-1155-2011>, 2011.
- Earle, M. E., Liu, P. S. K., Strapp, J. W., Zelenyuk, A., Imre, D., McFarquhar, G. M., Shantz, N. C., and Leitch, W. R.: Factors influencing the microphysics and radiative properties of liquid-dominated Arctic clouds: Insight from observations of aerosol and clouds during ISDAC, *J. Geophys. Res.: Atmos.*, 116, Artn D00t09, <https://doi.org/10.1029/2011jd015887>, 2011.
- 675 Eckhardt, S., Quennehen, B., Olivie, D. J. L., Berntsen, T. K., Cherian, R., Christensen, J. H., Collins, W., Crepinsek, S., Daskalakis, N., Flanner, M., Herber, A., Heyes, C., Hodnebrog, O., Huang, L., Kanakidou, M., Klimont, Z., Langner, J., Law, K. S., Lund, M. T., Mahmood, R., Massling, A., Myriokefalitakis, S., Nielsen, I. E., Nøjgaard, J. K., Quaas, J., Quinn, P. K., Raut, J. C., Rumbold, S. T., Schulz, M., Sharma, S., Skeie, R. B., Skov, H., Uttal, T., von Salzen, K., and Stohl, A.: Current model capabilities for simulating black carbon and sulfate concentrations in the Arctic atmosphere: a multi-model evaluation using a comprehensive measurement data set, *Atmos. Chem. Phys.*, 15, 9413-9433, <https://doi.org/10.5194/acp-15-9413-2015>, 2015.
- 680 Fenger, M., Sørensen, L. L., Kristensen, K., Jensen, B., Nguyen, Q. T., Nøjgaard, J. K., Massling, A., Skov, H., Becker, T., and Glasius, M.: Sources of anions in aerosols in northeast Greenland during late winter, *Atmos. Chem. Phys.*, 13, 1569-1578, <https://doi.org/10.5194/acp-13-1569-2013>, 2013.
- Frossard, A. A., Shaw, P. M., Russell, L. M., Kroll, J. H., Canagaratna, M. R., Worsnop, D. R., Quinn, P. K., and Bates, T. S.: Springtime Arctic haze contributions of submicron organic particles from European and Asian combustion sources, *J. Geophys. Res.: Atmos.*, 116, Artn D05205, <https://doi.org/10.1029/2010jd015178>, 2011.
- 690 Fu, P. Q., Kawamura, K., Chen, J., Qin, M. Y., Ren, L. J., Sun, Y. L., Wang, Z. F., Barrie, L. A., Tachibana, E., Ding, A. J., and Yamashita, Y.: Fluorescent water-soluble organic aerosols in the High Arctic atmosphere, *Sci Rep-Uk*, 5, ARTN 9845, <https://doi.org/10.1038/srep09845>, 2015.
- Garrett, T. J., Brattstrom, S., Sharma, S., Worthy, D. E. J., and Novelli, P.: The role of scavenging in the seasonal transport of black carbon and sulfate to the Arctic, *Geophys. Res. Lett.*, 38, <https://doi.org/10.1029/2011GL048221>, 2011.
- 695 Gong, S. L., Zhao, T. L., Sharma, S., Toom-Saunty, D., Lavoue, D., Zhang, X. B., Leitch, W. R., and Barrie, L. A.: Identification of trends and interannual variability of sulfate and black carbon in the Canadian High Arctic: 1981-2007, *J. Geophys. Res.: Atmos.*, 115, Artn D07305, <https://doi.org/10.1029/2009jd012943>, 2010.



- 700 Heidam, N. Z.: The Components of the Arctic Aerosol, *Atmos. Environ.*, 18, 329-343, [https://doi.org/10.1016/0004-6981\(84\)90107-0](https://doi.org/10.1016/0004-6981(84)90107-0), 1984.
- Heidam, N. Z., Wahlin, P., and Christensen, J. H.: Tropospheric gases and aerosols in Northeast Greenland, *Journal of the Atmospheric Sciences*, 56, 261-278, [https://doi.org/10.1175/1520-0469\(1999\)056<0261:tgaain>2.0.co;2](https://doi.org/10.1175/1520-0469(1999)056<0261:tgaain>2.0.co;2), 1999.
- 705 Heidam, N. Z., Christensen, J., Wählin, P., and Skov, H.: Arctic atmospheric contaminants in NE Greenland: levels, variations, origins, transport, transformations and trends 1990-2001, *Sci. Total Environ.*, 331, 5-28, <https://doi.org/10.1016/j.scitotenv.2004.03.033>, 2004.
- Hennigan, C. J., Sullivan, A. P., Collett, J. L., and Robinson, A. L.: Levoglucosan stability in biomass burning particles exposed to hydroxyl radicals, *Geophys. Res. Lett.*, 37, L09806, <https://doi.org/10.1029/2010gl043088>, 2010.
- 710 Hirdman, D., Burkhardt, J. F., Sodemann, H., Eckhardt, S., Jefferson, A., Quinn, P. K., Sharma, S., Strom, J., and Stohl, A.: Long-term trends of black carbon and sulphate aerosol in the Arctic: changes in atmospheric transport and source region emissions, *Atmos. Chem. Phys.*, 10, 9351-9368, <https://doi.org/10.5194/acp-10-9351-2010>, 2010.
- 715 Hoffmann, D., Tilgner, A., Iinuma, Y., and Herrmann, H.: Atmospheric Stability of Levoglucosan: A Detailed Laboratory and Modeling Study, *Environ. Sci. Technol.*, 44, 694-699, <https://doi.org/10.1021/es902476f>, 2010.
- Hoffmann, E. H., Tilgner, A., Schrodner, R., Brauera, P., Wolke, R., and Herrmann, H.: An advanced modeling study on the impacts and atmospheric implications of multiphase dimethyl sulfide chemistry, *Proceedings of the National Academy of Sciences of the United States of America*, 113, 11776-11781, <https://doi.org/10.1073/pnas.1606320113>, 2016.
- 720 Huang, S., Poulain, L., van Pinxteren, D., van Pinxteren, M., Wu, Z. J., Herrmann, H., and Wiedensohler, A.: Latitudinal and Seasonal Distribution of Particulate MSA over the Atlantic using a Validated Quantification Method with HR-ToF-AMS, *Environ. Sci. Technol.*, 51, 418-426, <https://doi.org/10.1021/acs.est.6b03186>, 2017.
- 725 IPCC: Climate Change 2013: The Physical Science Basis. Contribution of Working Group I to the Fifth Assessment Report of the Intergovernmental Panel on Climate Change, Cambridge University Press, Cambridge, United Kingdom and New York, NY, USA, 1535 pp., 2013.
- Jayne, J. T., Leard, D. C., Zhang, X., Davidovits, P., Smith, K. A., Kolb, C. E., and Worsnop, D. R.: Development of an Aerosol Mass Spectrometer for Size and Composition Analysis of Submicron Particles, *Aerosol Sci. Technol.*, 33, 49-70, <https://doi.org/10.1080/027868200410840>, 2000.
- 730



- Jimenez, J. L., Jayne, J. T., Shi, Q., Kolb, C. E., Worsnop, D. R., Yourshaw, I., Seinfeld, J. H., Flagan, R. C., Zhang, X. F., Smith, K. A., Morris, J. W., and Davidovits, P.: Ambient aerosol sampling using the Aerodyne Aerosol Mass Spectrometer, *J. Geophys. Res.: Atmos.*, 108, Artn 8425, <https://doi.org/10.1029/2001jd001213>, 2003.
- 735
- Kawamura, K., Kasukabe, H., and Barrie, L. A.: Secondary formation of water-soluble organic acids and alpha-dicarbonyls and their contributions to total carbon and water-soluble organic carbon: Photochemical aging of organic aerosols in the Arctic spring, *J. Geophys. Res.: Atmos.*, 115, Artn D21306, <https://doi.org/10.1029/2010jd014299>, 2010.
- Kodros, J. K., Hanna, S. J., Bertram, A. K., Leaitch, W. R., Schulz, H., Herber, A. B., Zanatta, M., Burkart, J., Willis, M. D., Abbatt, J. P. D., and Pierce, J. R.: Size-resolved mixing state of black carbon in the Canadian high Arctic and implications for simulated direct radiative effect, *Atmos. Chem. Phys.*, 18, 11345-11361, <https://doi.org/10.5194/acp-18-11345-2018>, 2018.
- 740
- Komppula, M., Lihavainen, H., Kerminen, V. M., Kulmala, M., and Viisanen, Y.: Measurements of cloud droplet activation of aerosol particles at a clean subarctic background site, *J. Geophys. Res.: Atmos.*, 110, Artn D06204, <https://doi.org/10.1029/2004jd005200>, 2005.
- 745
- Laing, J. R., Hopke, P. K., Hopke, E. F., Husain, L., Dutkiewicz, V. A., Paatero, J., and Viisanen, Y.: Long-term trends of biogenic sulfur aerosol and its relationship with sea surface temperature in Arctic Finland, *J. Geophys. Res.: Atmos.*, 118, Artn 776, 11770-11776, <https://doi.org/10.1002/2013jd020384>, 2013.
- 750
- Lana, A., Bell, T. G., Simo, R., Vallina, S. M., Ballabrera-Poy, J., Kettle, A. J., Dachs, J., Bopp, L., Saltzman, E. S., Stefels, J., Johnson, J. E., and Liss, P. S.: An updated climatology of surface dimethylsulfide concentrations and emission fluxes in the global ocean, *Global Biogeochem. Cycles*, 25, Artn Gb1004, <https://doi.org/10.1029/2010gb003850>, 2011.
- 755
- Lange, R., Dall'Osto, M., Skov, H., Nojgaard, J. K., Nielsen, I. E., Beddowse, D. C. S., Simob, R., Harrison, R. M., and Massling, A.: Characterization of distinct Arctic aerosol accumulation modes and their sources, *Atmos. Environ.*, 183, 1-10, <https://doi.org/10.1016/j.atmosenv.2018.03.060>, 2018.
- Lanz, V. A., Alfàrra, M. R., Baltensperger, U., Buchmann, B., Hueglin, C., and Prevot, A. S. H.: Source apportionment of submicron organic aerosols at an urban site by factor analytical modelling of aerosol mass spectra, *Atmos. Chem. Phys.*, 7, 1503-1522, <https://doi.org/10.5194/acp-7-1503-2007>, 2007.
- 760
- Law, K. S., and Stohl, A.: Arctic Air Pollution: Origins and Impacts, *Science*, 315, 1537-1540, <https://doi.org/10.1126/science.1137695>, 2007.
- Leaitch, W. R., Russell, L. M., Liu, J., Kolonjari, F., Toom, D., Huang, L., Sharma, S., Chivulescu, A., Veber, D., and Zhang, W. D.: Organic functional groups in the submicron aerosol at 82.5 degrees N, 62.5



- 765 degrees W from 2012 to 2014, Atmos. Chem. Phys., 18, 3269-3287, <https://doi.org/10.5194/acp-18-3269-2018>, 2018.
- Leck, C., and Bigg, E. K.: Source and evolution of the marine aerosol - A new perspective, Geophys. Res. Lett., 32, Artn L19803, <https://doi.org/10.1029/2005gl023651>, 2005.
- 770 Lee, B. P., Li, Y. J., Yu, J. Z., Louie, P. K. K., and Chan, C. K.: Physical and chemical characterization of ambient aerosol by HR-ToF-AMS at a suburban site in Hong Kong during springtime 2011, J. Geophys. Res.: Atmos., 118, 8625-8639, <https://doi.org/10.1002/jgrd.50658>, 2013.
- Lee, T., Sullivan, A. P., Mack, L., Jimenez, J. L., Kreidenweis, S. M., Onasch, T. B., Worsnop, D. R., Malm, W., Wold, C. E., Hao, W. M., and Collett, J. L.: Chemical Smoke Marker Emissions During Flaming and Smoldering Phases of Laboratory Open Burning of Wildland Fuels, Aerosol Sci. Technol., 775 44, 1-5, <https://doi.org/10.1080/02786826.2010.499884>, 2010.
- Lenton, T. M.: Arctic climate tipping points, A Journal of the Human Environment, 41, 10-22, <https://doi.org/10.1007/s13280-011-0221-x>, 2012.
- 780 Liu, S., Aiken, A. C., Gorkowski, K., Dubey, M. K., Cappa, C. D., Williams, L. R., Herndon, S. C., Massoli, P., Fortner, E. C., Chhabra, P. S., Brooks, W. A., Onasch, T. B., Jayne, J. T., Worsnop, D. R., China, S., Sharma, N., Mazzoleni, C., Xu, L., Ng, N. L., Liu, D., Allan, J. D., Lee, J. D., Fleming, Z. L., Mohr, C., Zotter, P., Szidat, S., and Prevot, A. S. H.: Enhanced light absorption by mixed source black and brown carbon particles in UK winter, Nat. Commun., 6, No. 8435, <https://doi.org/10.1038/ncomms9435>, 2015.
- 785 Mahmood, R., von Salzen, K., Flanner, M., Sand, M., Langner, J., Wang, H. L., and Huang, L.: Seasonality of global and Arctic black carbon processes in the Arctic Monitoring and Assessment Programme models, J. Geophys. Res.: Atmos., 121, 7100-7116, <https://doi.org/10.1002/2016jd024849>, 2016.
- 790 Martinsson, J., Eriksson, A. C., Nielsen, I. E., Malmberg, V. B., Ahlberg, E., Andersen, C., Lindgren, R., Nystrom, R., Nordin, E. Z., Brune, W. H., Svenningsson, B., Swietlicki, E., Boman, C., and Pagels, J. H.: Impacts of Combustion Conditions and Photochemical Processing on the Light Absorption of Biomass Combustion Aerosol, Environ. Sci. Technol., 49, 14663-14671, <https://doi.org/10.1021/acs.est.5b03205>, 2015.
- 795 Massling, A., Nielsen, I. E., Kristensen, D., Christensen, J. H., Sorensen, L. L., Jensen, B., Nguyen, Q. T., Nojgaard, J. K., Glasius, M., and Skov, H.: Atmospheric black carbon and sulfate concentrations in Northeast Greenland, Atmos. Chem. Phys., 15, 9681-9692, <https://doi.org/10.5194/acp-15-9681-2015>, 2015.



- Matthew, B. M., Middlebrook, A. M., and Onasch, T. B.: Collection efficiencies in an Aerodyne Aerosol Mass Spectrometer as a function of particle phase for laboratory generated aerosols, *Aerosol Sci. Technol.*, 42, 884-898, <https://doi.org/10.1080/02786820802356797>, 2008.
- 800 Middlebrook, A. M., Bahreini, R., Jimenez, J. L., and Canagaratna, M. R.: Evaluation of Composition-Dependent Collection Efficiencies for the Aerodyne Aerosol Mass Spectrometer using Field Data, *Aerosol Sci. Technol.*, 46, 258-271, <https://doi.org/10.1080/02786826.2011.620041>, 2012.
- Narukawa, M., Kawamura, K., Li, S. M., and Bottenheim, J. W.: Stable carbon isotopic ratios and ionic composition of the high-Arctic aerosols: An increase in delta C-13 values from winter to spring, *J. Geophys. Res.: Atmos.*, 113, Artn D02312, <https://doi.org/10.1029/2007jd008755>, 2008.
- 805 Nguyen, Q. T., Skov, H., Sorensen, L. L., Jensen, B. J., Grube, A. G., Massling, A., Glasius, M., and Nøjgaard, J. K.: Source apportionment of particles at Station Nord, North East Greenland during 2008-2010 using COPREM and PMF analysis, *Atmos. Chem. Phys.*, 13, 35-49, <https://doi.org/10.5194/acp-13-35-2013>, 2013.
- 810 Nguyen, Q. T., Glasius, M., Sørensen, L. L., Jensen, B., Skov, H., Birmili, W., Wiedensohler, A., Kristensson, A., Nøjgaard, J. K., and Massling, A.: Seasonal variation of atmospheric particle number concentrations, new particle formation and atmospheric oxidation capacity at the high Arctic site Villum Research Station, Station Nord, *Atmos. Chem. Phys.*, 16, 11319-11336, <https://doi.org/10.5194/acp-16-11319-2016>, 2016.
- 815 Onasch, T. B., Trimborn, A., Fortner, E. C., Jayne, J. T., Kok, G. L., Williams, L. R., Davidovits, P., and Worsnop, D. R.: Soot Particle Aerosol Mass Spectrometer: Development, Validation, and Initial Application, *Aerosol Sci. Technol.*, 46, 804-817, <https://doi.org/10.1080/02786826.2012.663948>, 2012.
- Orellana, M. V., Matrai, P. A., Leck, C., Rauschenberg, C. D., Lee, A. M., and Coz, E.: Marine microgels as a source of cloud condensation nuclei in the high Arctic, *Proceedings of the National Academy of Sciences of the United States of America*, 108, 13612-13617, <https://doi.org/10.1073/pnas.1102457108>, 2011.
- 820 Ovadnevaite, J., O'Dowd, C., Dall'Osto, M., Ceburnis, D., Worsnop, D. R., and Berresheim, H.: Detecting high contributions of primary organic matter to marine aerosol: A case study, *Geophys. Res. Lett.*, 38, Artn L02807, <https://doi.org/10.1029/2010gl046083>, 2011.
- 825 Paatero, P., and Tapper, U.: Positive Matrix Factorization - a Nonnegative Factor Model with Optimal Utilization of Error-Estimates of Data Values, *Environmetrics*, 5, 111-126, <https://doi.org/10.1002/env.3170050203>, 1994.
- Paatero, P.: Least squares formulation of robust non-negative factor analysis, *Chemom. Intell. Lab. Syst.*, 37, 23-35, [https://doi.org/10.1016/s0169-7439\(96\)00044-5](https://doi.org/10.1016/s0169-7439(96)00044-5), 1997.



830 Petzold, A., Kopp, C., and Niessner, R.: The dependence of the specific attenuation cross-section on black carbon mass fraction and particle size, *Atmos. Environ.*, 31, 661-672, [https://doi.org/10.1016/s1352-2310\(96\)00245-2](https://doi.org/10.1016/s1352-2310(96)00245-2), 1997.

Petzold, A., and Schonlinner, M.: Multi-angle absorption photometry - a new method for the measurement of aerosol light absorption and atmospheric black carbon, *J. Aerosol Sci.*, 35, 421-441, 835 <https://doi.org/10.1016/j.jaerosci.2003.09.005>, 2004.

Quinn, P. K., Miller, T. L., Bates, T. S., Ogren, J. A., Andrews, E., and Shaw, G. E.: A 3-year record of simultaneously measured aerosol chemical and optical properties at Barrow, Alaska, *J. Geophys. Res.: Atmos.*, 107, Artn 4130, <https://doi.org/10.1029/2001jd001248>, 2002.

840 Quinn, P. K., Bates, T. S., Coffman, D., Onasch, T. B., Worsnop, D., Baynard, T., de Gouw, J. A., Goldan, P. D., Kuster, W. C., Williams, E., Roberts, J. M., Lerner, B., Stohl, A., Pettersson, A., and Lovejoy, E. R.: Impacts of sources and aging on submicrometer aerosol properties in the marine boundary layer across the Gulf of Maine, *J. Geophys. Res.: Atmos.*, 111, Artn D23s36, <https://doi.org/10.1029/2006jd007582>, 2006.

845 Quinn, P. K., Shaw, G., Andrews, E., Dutton, E. G., Ruoho-Airola, T., and Gong, S. L.: Arctic haze: current trends and knowledge gaps, *Tellus B*, 59, 99-114, <https://doi.org/10.1111/j.1600-0889.2006.00238.x>, 2007.

850 Quinn, P. K., Bates, T. S., Baum, E., Doubleday, N., Fiore, A. M., Flanner, M., Fridlind, A., Garrett, T. J., Koch, D., Menon, S., Shindell, D., Stohl, A., and Warren, S. G.: Short-lived pollutants in the Arctic: their climate impact and possible mitigation strategies, *Atmos. Chem. Phys.*, 8, 1723-1735, <https://doi.org/10.5194/acp-8-1723-2008>, 2008.

Quinn, P. K., Bates, T. S., Schulz, K., and Shaw, G. E.: Decadal trends in aerosol chemical composition at Barrow, Alaska: 1976-2008, *Atmos. Chem. Phys.*, 9, 8883-8888, <https://doi.org/10.5194/acp-9-8883-2009>, 2009.

855 Rahn, K. A., and Heidam, N. Z.: Progress in Arctic Air Chemistry, 1977-1980 - a Comparison of the 1st and 2nd Symposia, *Atmos. Environ.*, 15, 1345-1348, [https://doi.org/10.1016/0004-6981\(81\)90339-5](https://doi.org/10.1016/0004-6981(81)90339-5), 1981.

860 Saarnio, K., Teinila, K., Saarikoski, S., Carbone, S., Gilardoni, S., Timonen, H., Aurela, M., and Hillamo, R.: Online determination of levoglucosan in ambient aerosols with particle-into-liquid sampler - high-performance anion-exchange chromatography - mass spectrometry (PILS-HPAEC-MS), *Atmos. Meas. Tech.*, 6, 2839-2849, <https://doi.org/10.5194/amt-6-2839-2013>, 2013.

Schmeisser, L., Backman, J., Ogren, J. A., Andrews, E., Asmi, E., Starkweather, S., Uttal, T., Fiebig, M., Sharma, S., Eleftheriadis, K., Vratolis, S., Bergin, M., Tunved, P., and Jefferson, A.: Seasonality of





- aerosol optical properties in the Arctic, *Atmos. Chem. Phys.*, 18, 11599-11622, <https://doi.org/10.5194/acp-18-11599-2018>, 2018.
- 865 Sharma, S., Brook, J. R., Cachier, H., Chow, J., Gaudenzi, A., and Lu, G.: Light absorption and thermal measurements of black carbon in different regions of Canada, *J. Geophys. Res.: Atmos.*, 107, 4771, <https://doi.org/10.1029/2002JD002496>, 2002.
- Sharma, S., Lavoue, D., Cachier, H., Barrie, L. A., and Gong, S. L.: Long-term trends of the black carbon concentrations in the Canadian Arctic, *J. Geophys. Res.: Atmos.*, 109, 870 <https://doi.org/10.1029/2003JD004331>, 2004.
- Sharma, S., Andrews, E., Barrie, L. A., Ogren, J. A., and Lavoue, D.: Variations and sources of the equivalent black carbon in the high Arctic revealed by long-term observations at Alert and Barrow: 1989-2003, *J. Geophys. Res.: Atmos.*, 111, D14208, <https://doi.org/10.1029/2005JD006581>, 2006.
- Sharma, S., Chan, E., Ishizawa, M., Toom-Sauntry, D., Gong, S. L., Li, S. M., Tarasick, D. W., Leitch, 875 W. R., Norman, A., Quinn, P. K., Bates, T. S., Levasseur, M., Barrie, L. A., and Maenhaut, W.: Influence of transport and ocean ice extent on biogenic aerosol sulfur in the Arctic atmosphere, *J. Geophys. Res.: Atmos.*, 117, Artn D12209, <https://doi.org/10.1029/2011jd017074>, 2012.
- Sharma, S., Ishizawa, M., Chan, D., Lavoue, D., Andrews, E., Eleftheriadis, K., and Maksyutov, S.: 16- 880 year simulation of Arctic black carbon: Transport, source contribution, and sensitivity analysis on deposition, *J. Geophys. Res.: Atmos.*, 118, 943-964, <https://doi.org/10.1029/2012JD017774>, 2013.
- Shaw, P. M., Russell, L. M., Jefferson, A., and Quinn, P. K.: Arctic organic aerosol measurements show particles from mixed combustion in spring haze and from frost flowers in winter, *Geophys. Res. Lett.*, 37, Artn L10803, <https://doi.org/10.1029/2010gl042831>, 2010.
- Skov, H., Wahlin, P., Christensen, J., Heidam, N. Z., and Petersen, D.: Measurements of elements, 885 sulphate and SO<sub>2</sub> in Nuuk Greenland, *Atmos. Environ.*, 40, 4775-4781, <https://doi.org/10.1016/j.atmosenv.2006.03.057>, 2006.
- Skov, H., Massling, A., Nielsen, I. E., Nordstrøm, C., Bossi, R., Vorkamp, K., Christensen, J., Larsen, M. M., M Hansen, K. M., Lüsberg, J. B., and Poulsen, M. B.: AMAP core - atmospheric part: from 1990 to 2015. Results from Villum Research Station, Technical report no. 101, Aarhus University, DCE - 890 Danish Centre for Environment and Energy, 2017.
- Sodemann, H., Pommier, M., Arnold, S. R., Monks, S. A., Stebel, K., Burkhardt, J. F., Hair, J. W., Diskin, G. S., Clerbaux, C., Coheur, P.-F., Hurtmans, D., Schlager, H., Blechschmidt, A.-M., Kristjánsson, J. E., and Stohl, A.: Episodes of cross-polar transport in the Arctic troposphere during July 2008 as seen from 895 models, satellite, and aircraft observations, *Atmos. Chem. Phys.*, 11, 3631-3651, <https://doi.org/10.5194/acp-11-3631-2011>, 2011.



- Stohl, A.: Characteristics of atmospheric transport into the Arctic troposphere, *J. Geophys. Res.: Atmos.*, 111, Artn D11306, <https://doi.org/10.1029/2005jd006888>, 2006.
- Stohl, A., Berg, T., Burkhardt, J. F., Fjærraa, A. M., Forster, C., Herber, A., Hov, Ø., Lunder, C., McMillan, W. W., Oltmans, S., Shiobara, M., Simpson, D., Solberg, S., Stebel, K., Ström, J., Tørseth, K., Treffeisen, R., Virkkunen, K., and Yttri, K. E.: Arctic smoke - record high air pollution levels in the European Arctic due to agricultural fires in Eastern Europe in spring 2006, *Atmos. Chem. Phys.*, 7, 511-534, <https://doi.org/10.5194/acp-7-511-2007>, 2007.
- Stohl, A., Klimont, Z., Eckhardt, S., Kupiainen, K., Shevchenko, V. P., Kopeikin, V. M., and Novigatsky, A. N.: Black carbon in the Arctic: the underestimated role of gas flaring and residential combustion emissions, *Atmos. Chem. Phys.*, 13, 8833-8855, <https://doi.org/10.5194/acp-13-8833-2013>, 2013.
- Stroeve, J., Holland, M. M., Meier, W., Scambos, T., and Serreze, M.: Arctic sea ice decline: Faster than forecast, *Geophys. Res. Lett.*, 34, L09501, <https://doi.org/10.1029/2007gl029703>, 2007.
- Tunved, P., Strom, J., and Krejci, R.: Arctic aerosol life cycle: linking aerosol size distributions observed between 2000 and 2010 with air mass transport and precipitation at Zeppelin station, Ny-Alesund, Svalbard, *Atmos. Chem. Phys.*, 13, 3643-3660, <https://doi.org/10.5194/acp-13-3643-2013>, 2013.
- Twomey, S.: The influence of pollution on the shortwave albedo of clouds, *J. Atmos. Sci.*, 34, 1149-1152, [https://doi.org/10.1175/1520-0469\(1977\)034<1149:TIOPOT>2.0.CO;2](https://doi.org/10.1175/1520-0469(1977)034<1149:TIOPOT>2.0.CO;2), 1977.
- Udisti, R., Bazzano, A., Becagli, S., Bolzacchini, E., Caiazzo, L., Cappelletti, D., Ferrero, L., Frosini, D., Giardi, F., Grotti, M., Lupi, A., Malandrino, M., Mazzola, M., Moroni, B., Severi, M., Traversi, R., Viola, A., and Vitale, V.: Sulfate source apportionment in the Ny-Alesund (Svalbard Islands) Arctic aerosol, *Rend Lincei-Sci Fis*, 27, 85-94, <https://doi.org/10.1007/s12210-016-0517-7>, 2016.
- Ulbrich, I. M., Canagaratna, M. R., Zhang, Q., Worsnop, D. R., and Jimenez, J. L.: Interpretation of organic components from Positive Matrix Factorization of aerosol mass spectrometric data, *Atmos. Chem. Phys.*, 9, 2891-2918, <https://doi.org/10.5194/acp-9-2891-2009>, 2009.
- Willis, M. D., Leaitch, W. R., and Abbatt, J. P. D.: Processes Controlling the Composition and Abundance of Arctic Aerosol, *Rev. Geophys.*, 56, <https://doi.org/doi:10.1029/2018RG000602>, 2018.
- Winiger, P., Andersson, A., Yttri, K. E., Tunved, P., and Gustafsson, O.: Isotope-Based Source Apportionment of EC Aerosol Particles during Winter High-Pollution Events at the Zeppelin Observatory, Svalbard, *Environ. Sci. Technol.*, 49, 11959-11966, <https://doi.org/10.1021/acs.est.5b02644>, 2015.
- Zangrando, R., Barbaro, E., Zennaro, P., Rossi, S., Kehrwald, N. M., Gabrieli, J., Barbante, C., and Gambaro, A.: Molecular Markers of Biomass Burning in Arctic Aerosols, *Environ. Sci. Technol.*, 47, 8565-8574, <https://doi.org/10.1021/es400125r>, 2013.

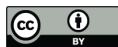

Zhang, Q., Alfarra, M. R., Worsnop, D. R., Allan, J. D., Coe, H., Canagaratna, M. R., and Jimenez, J. L.:  
930 Deconvolution and quantification of hydrocarbon-like and oxygenated organic aerosols based on aerosol  
mass spectrometry, Environ. Sci. Technol., 39, 4938-4952, <https://doi.org/10.1021/es048568j>, 2005.

Zhang, Q., Jimenez, J. L., Canagaratna, M. R., Ulbrich, I. M., Ng, N. L., Worsnop, D. R., and Sun, Y.:  
Understanding atmospheric organic aerosols via factor analysis of aerosol mass spectrometry: a review,  
Anal. Bioanal. Chem., 401, 3045-3067, <https://doi.org/10.1007/s00216-011-5355-y>, 2011.

935

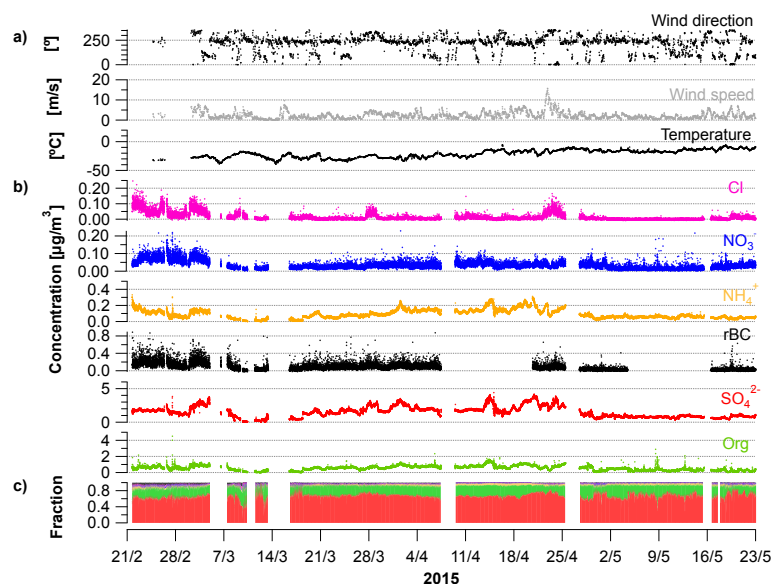

940 **Figure 1** Time series from 21 February to 23 May 2015 showing a) wind direction [°], mean wind speed [m/s] and temperature [°C], b) concentrations of Cl<sup>-</sup>, NO<sub>3</sub><sup>-</sup>, NH<sub>4</sub><sup>+</sup>, rBC, SO<sub>4</sub><sup>2-</sup> and OA from the SP-AMS [μg/m<sup>3</sup>], and c) fraction of the aerosol species to the total PM<sub>1</sub>.

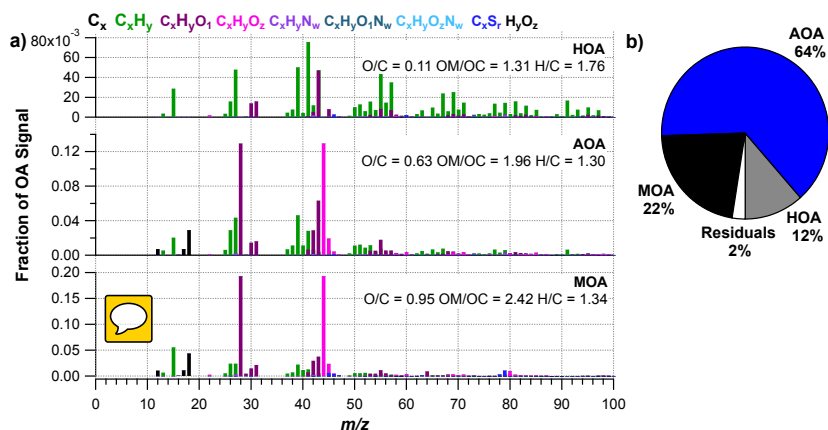

945 **Figure 2** a) High-resolution mass spectra of PMF factors hydrocarbon-like organic aerosol (HOA), Arctic haze organic aerosol (AOA) and marine organic aerosol (MOA), and b) factor share of ambient mass concentration. O/C, OM/OC and H/C ratio are presented for each factor.

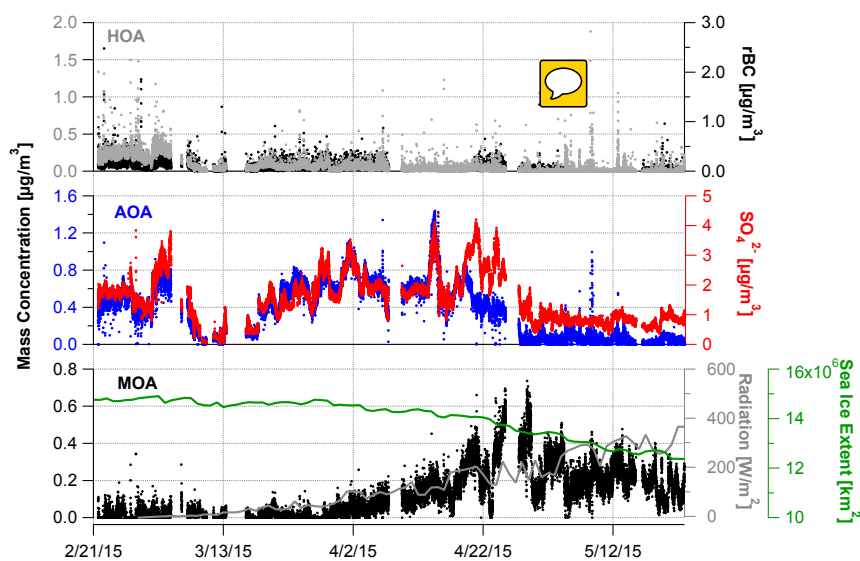

**Figure 3** Time series for hydrocarbon-like organic aerosol (HOA), Arctic haze organic aerosol (AOA), marine organic aerosol (MOA) and tracers (rBC,  $\text{SO}_4^{2-}$ ). Sea ice extension on the Northern hemisphere and short-wave radiation (daily average) are included in the time series for MOA (see text).

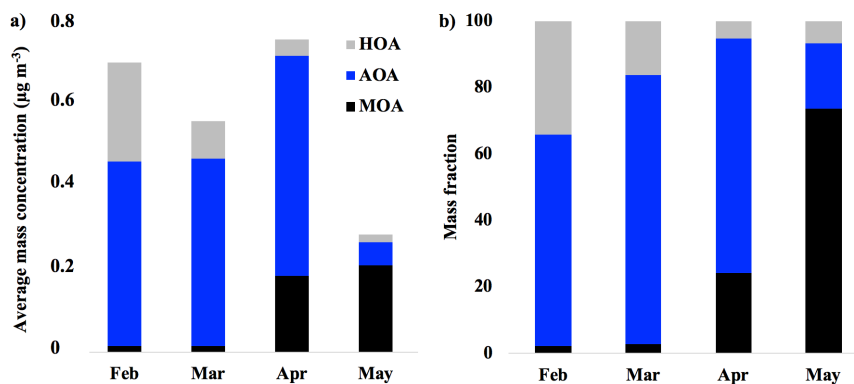

**Figure 4** a) average mass concentration ( $\mu\text{g m}^{-3}$ ) of hydrocarbon-like organic aerosol (HOA), Arctic haze organic aerosol (AOA) and marine organic aerosol (MOA) in February, March, April and May. b) mass fraction of HOA, AOA and MOA in February, March, April and May.

950



955 **Table 1** Detection limits. The detection limits for the SP-AMS is calculated from periods sampling through HEPA filters with a time resolution of 2 minutes (average from eight hepafilter periods of 30 to 60 minutes over the entire campaign). The detection limit for the MAAP is from Massling et al. (2015).

| Instruments | Species               | Lower Detection Limit            |
|-------------|-----------------------|----------------------------------|
| AMS         | HR Org                | 0.131 $\mu\text{g}/\text{m}^3$   |
|             | HR $\text{SO}_4^{2-}$ | 0.024 $\mu\text{g}/\text{m}^3$   |
|             | HR $\text{NO}_3^-$    | 0.021 $\mu\text{g}/\text{m}^3$   |
|             | HR $\text{NH}_4^+$    | 0.006 $\mu\text{g}/\text{m}^3$   |
|             | HR Cl                 | 0.014 $\mu\text{g}/\text{m}^3$   |
|             | HR rBC                | 0.010 $\mu\text{g}/\text{m}^3$   |
| MAAP        | BC                    | < 0.006 $\mu\text{g}/\text{m}^3$ |

**Table 2**  $R^2$  correlations between PMF factors and tracers (rBC, MSA,  $\text{SO}_4^{2-}$  and  $\text{NH}_4^+$ ).

|                    | HOA | AOA         | MOA         | rBC         | MSA         | $\text{SO}_4^{2-}$ | $\text{NH}_4^+$ |
|--------------------|-----|-------------|-------------|-------------|-------------|--------------------|-----------------|
| HOA                | -   | <b>0.08</b> | <b>0.11</b> | <b>0.35</b> | <b>0.13</b> | <b>0.08</b>        | <b>0.04</b>     |
| AOA                | -   | -           | <b>0.14</b> | <b>0.21</b> | <b>0.27</b> | <b>0.67</b>        | <b>0.49</b>     |
| MOA                | -   | -           | -           | <b>0.07</b> | <b>0.68</b> | <b>0.00</b>        | <b>0.03</b>     |
| rBC                | -   | -           | -           | -           | <b>0.08</b> | <b>0.18</b>        | <b>0.15</b>     |
| MSA                | -   | -           | -           | -           | -           | <b>0.02</b>        | <b>0.00</b>     |
| $\text{SO}_4^{2-}$ | -   | -           | -           | -           | -           | -                  | <b>0.70</b>     |
| $\text{NH}_4^+$    | -   | -           | -           | -           | -           | -                  | -               |

960
